# Supplementary material for: 4-Aminoquinoline-Based Adamantanes as Potential Anticholinesterase Agents in Symptomatic Treatment of Alzheimer’s Disease
Source: Pharmaceutics. 2022 Jun 20;14(6):1305. doi: 10.3390/pharmaceutics14061305 (PMC9229919; doi:10.3390/pharmaceutics14061305)
Supplement: Supplementary file 1 [file pharmaceutics-14-01305-s001.zip › Supplementary Materials File S2_final_Proof2_Opsenica.pdf]

## Supplementary Information 2

### 4-aminoquinolines-based adamantanes as potential anticholinesterase agents in symptomatic treatment of Alzheimer's disease

Katarina Komatović<sup>1</sup>, Ana Matošević<sup>2</sup>, Suzana Žunec<sup>2</sup>, Nataša Terzić-Jovanović<sup>3</sup>, Sandra Šegan<sup>3</sup>, Mario Zlatović,<sup>1</sup> Nikola Maraković<sup>2</sup>, Anita Bosak<sup>2,\*</sup>, Dejan Opsenica<sup>3,4,\*</sup>

<sup>1</sup> University of Belgrade - Faculty of Chemistry, Studentski trg 12 -16, 11158 Belgrade, Serbia,

<sup>2</sup> Institute for Medical Research and Occupational Health, Ksaverska cesta 2, Zagreb, Croatia,

<sup>3</sup> University of Belgrade – Institute of Chemistry, Technology and Metallurgy (IHTM), Njegoševa 12, 11000 Belgrade, Serbia,

<sup>4</sup> Centre of Excellence in Environmental Chemistry and Engineering, ICTM, 11000 Belgrade, Serbia

\* Correspondence: abosak@imi.hr (A.B.); dopsen@chem.bg.ac.rs (D.O.)

#### Content:

|                                                                                                                                                                                                                                                                     |     |
|---------------------------------------------------------------------------------------------------------------------------------------------------------------------------------------------------------------------------------------------------------------------|-----|
| <b>Detailed description of the docking procedure</b>                                                                                                                                                                                                                | S2  |
| <b>List of interactions between tested aminoquinolines and AChE</b>                                                                                                                                                                                                 | S4  |
| <b>List of interactions between tested aminoquinolines and BChE</b>                                                                                                                                                                                                 | S13 |
| <b>Prediction of drug-likeness and blood-brain barrier (BBB) penetration</b>                                                                                                                                                                                        | S21 |
| <b>Table S1</b> <i>In silico</i> determined physicochemical characteristics of the tested aminoquinolines important for compounds to be orally active in humans and their <i>in silico</i> determined ability to pass the brain-blood barrier by passive transport. | S21 |
| <b><i>In vitro</i> determined the antioxidative potential of 4-aminoquinolines</b>                                                                                                                                                                                  | S22 |
| <b>Table S2</b> Determined FRAP values of tested aminoquinolines                                                                                                                                                                                                    | S22 |
| <b>Chromatographic determination of lipophilicity</b>                                                                                                                                                                                                               | S23 |
| <b>Multivariate statistical analysis and modelling</b>                                                                                                                                                                                                              | S23 |
| <b>Principal Component Analysis</b>                                                                                                                                                                                                                                 | S24 |
| <b>Figure S1.</b> PC1–PC2 score plots of retention parameters and descriptors (A and C respectively) and factor loadings (B and D respectively).                                                                                                                    | S26 |
| <b>Quantitative Structure-Property Relationship (QSPR)</b>                                                                                                                                                                                                          | S26 |
| <b>Table S3.</b> The statistical performances of QSPR models connecting the most contributing molecular descriptors with molecular lipophilicity                                                                                                                    | S28 |
| <b>References</b>                                                                                                                                                                                                                                                   | S29 |

## Detailed description of docking procedure

Ligands to be docked in the enzyme structures were created with ChemBio3D Ultra 13.0 (PerkinElmer, Inc., Waltham, MA, USA) and minimized using the CHARMM force field and Smart Minimizer minimization method of Minimize Ligands protocol implemented in Biovia Discovery Studio Client v18.1. (Dassault Systèmes, Vélizy-Villacoublay, France). Before starting molecular docking protocol ligands were prepared to utilize Prepare Ligands protocol with regards to possible different protonation states, isomers and tautomers at pH 7.4. Flexible Docking protocol [1] was used for docking ligands into the enzyme receptors with flexibly selected residues. The flexible protocol consisted of the following steps: enzyme conformations calculation with ChiFlex, ligand conformations creation, ligand docking into active enzyme conformations with LibDock, pose clustering to remove similar ligand poses, enzyme conformations rebuilding by refining selected enzyme side-chains in the presence of the rigid ligand with ChiRotor, and final ligand refinement using CDOCKER.

The enzyme? structures were prepared starting from the crystal structures of free AChE (PDB ID: 4EY4) [2] and BChE (PDB ID: 1P0I) [3]. Next, a network of conserved water molecules identified through superposition of numerous water networks from X-ray structures of various AChE/BChE complexes available from PDB database was mapped onto AChE/BChE structures. The binding site within AChE and BChE model receptors was defined by a sphere ( $r = 13.5 \text{ \AA}$  and  $14.0 \text{ \AA}$ , respectively) surrounding the residues that outline the active sites gorge. Following residues were selected as flexible: Tyr72, Trp86, Tyr124, Tyr133, Ser203, Trp236, Trp286, Phe297, Phe297, Glu334, Tyr337, Phe338, Tyr341, His447, and Tyr449 in case of AChE and Asn68, Asp70, Trp82, Gln119, Tyr128, Glu198, Ser198, Pro285, Leu286, Ser287, Trp231, Glu325, Phe329, Phe398, and His438 in case of BChE [4–6]. The rest of the parameters from the Flexible Docking protocol were set as follows: A maximum number of enzyme conformations processed for ligand docking was set to 100; Minimum angel, i.e. torsion angle cut off (degrees) to determine if two side-chain chi1 angles are the same or not, was set to 15; Confirmation Method, i.e. algorithm for generating ligand conformations, was set to BEST; a maximum number of conformations to be generated was set to 255; Energy Threshold, i.e. relative energy threshold (kcal/mol) within which conformations of separate isomers are created, was set to 20. Parameters for LibDock ligand docking were set as follows: Number of Hotspots, i.e. number of polar or apolar receptor hotspots for conformer matching, and Max Hits to Save were set to 100 and 20, respectively. Tolerance for a hotspot matching algorithm to dock ligands was set to 0.25; Maximum Number of Hits which specifies the maximum number of hits saved for each ligand during hotspots matching before the final pose minimization was set to 100 with Final Score Cutoff, i.e. fraction of the top-scoring poses reported set to 0.5; a maximum number of poses to be kept per conformation (i.e. Max Conformation Hits) was set to 30 with Maximum number of conformations

for each ligand (i.e. Max Start Conformations) set to 1000; Steric Fraction defining number of clashes before the pose-hotspot alignment is terminated was set to 0.10 within the 0.5 Å Final Cluster Radius; maximum values for the Apolar SASA Cutoff and Polar SASA Cutoff values were set to 15.0 Å and 5.0 Å, respectively. Finally, simulated annealing refinement was performed with 2000 heating phase steps during simulated annealing, 5000 steps of the cooling phase, and Heating Target Temperature and Cooling Target Temperature set to 700 K and 310 K, respectively.

The representative pose of each of the docked ligands was chosen based on the highest score as predicted by the scoring functions estimating binding affinities, implemented in the Biovia Discovery Studio Client v18.1. Score Ligand Poses protocol. The following scoring functions were calculated: CDOCKER Scores, LigScore1, LigScore2, PLP1, PLP2, Jain, PMF, PMF04, Ludi Energy Estimate 1, Ludi Energy Estimate 2, and Ludi Energy Estimate 3. To identify the poses of docked ligands that score high in more than one scoring function, the Biovia Discovery Studio Client v18.1 Consensus Score protocol was used. The Consensus Score protocol calculates the consensus scores of a series of docked ligands for which other scores have been previously computed. For each selected scoring function, the ligands are listed by score in descending order. The consensus score for a ligand is an integer between zero (none of the scores are in the top-ranking percentile) and the total number of scores (all of the scores are in the top-ranking percentile) listed in Input Properties. Thus, in the Parameters Explorer of Consensus Score protocol, following scoring functions were chosen to calculate the consensus score: -CDOCKER\_ENERGY, -CDOCKER\_INTERACTION\_ENERGY, LigScore1, LigScore2, PLP1, PLP2, Jain, PMF, PMF04, Ludi Energy Estimate 1, Ludi Energy Estimate 2, and Ludi Energy Estimate 3. Consensus Percentage was set to 40 to specify the percentage of top molecules to include in the consensus. Use Best Pose only was set to False. Finally, the poses with highest consensus score were chosen as the representative poses of each of the docked ligands and their model complexes ranked by CDOCKER energy as a measure of binding energy.

## List of interactions between aminoquinolines and AChE.

### Interactions between compound **1** and AChE.

| Amino acid | Non-bonding interactions                       |
|------------|------------------------------------------------|
| Tyr124     | H52, hydrogen bond-conventional hydrogen bond  |
| Tyr124     | H49, hydrogen bond-carbon hydrogen bond        |
| Tyr341     | N25, electrostatic- $\pi$ -cation              |
| Trp86      | <b>1</b> , hydrophobic- $\pi$ - $\pi$ T-shaped |
| Trp86      | <b>1</b> , hydrophobic- $\pi$ - $\pi$ T-shaped |
| Phe338     | <b>1</b> , hydrophobic- $\pi$ - $\pi$ T-shaped |
| His447     | <b>1</b> , hydrophobic- $\pi$ - $\pi$ T-shaped |
| His447     | <b>1</b> , hydrophobic- $\pi$ - $\pi$ T-shaped |
| Tyr72      | C7, hydrophobic- $\pi$ -alkyl                  |
| Tyr72      | <b>1</b> , hydrophobic- $\pi$ -alkyl           |
| Trp86      | Cl21, hydrophobic- $\pi$ -alkyl                |
| Trp86      | Cl21, hydrophobic- $\pi$ -alkyl                |
| Tyr124     | <b>1</b> , hydrophobic- $\pi$ -alkyl           |
| Trp286     | C7, hydrophobic- $\pi$ -alkyl                  |
| Trp286     | <b>1</b> , hydrophobic- $\pi$ -alkyl           |

### Interactions between compound **2** and AChE.

| Amino acid | Non-bonding interactions                       |
|------------|------------------------------------------------|
| Glu202     | N17, electrostatic-attractive charge           |
| Asp74      | N17, electrostatic-attractive charge           |
| His447     | H46, hydrogen bond-conventional hydrogen bond  |
| Tyr124     | H57, hydrogen bond-conventional hydrogen bond  |
| His447     | H47, hydrogen bond-carbon hydrogen bond        |
| Trp86      | N17, electrostatic- $\pi$ -cation              |
| Trp86      | N17, electrostatic- $\pi$ -cation              |
| Tyr337     | N17, electrostatic- $\pi$ -cation              |
| Tyr341     | N26, electrostatic- $\pi$ -cation              |
| Trp86      | <b>2</b> , hydrophobic- $\pi$ - $\pi$ stacked  |
| Trp86      | <b>2</b> , hydrophobic- $\pi$ - $\pi$ stacked  |
| Trp86      | <b>2</b> , hydrophobic- $\pi$ - $\pi$ stacked  |
| Trp86      | <b>2</b> , hydrophobic- $\pi$ - $\pi$ stacked  |
| Tyr337     | <b>2</b> , hydrophobic- $\pi$ - $\pi$ T-shaped |
| Ile451     | Cl21, hydrophobic-alkyl                        |
| Trp86      | Cl21, hydrophobic- $\pi$ -alkyl                |
| Tyr124     | <b>2</b> , hydrophobic- $\pi$ -alkyl           |
| Tyr133     | Cl21, hydrophobic- $\pi$ -alkyl                |
| Trp286     | <b>2</b> , hydrophobic- $\pi$ -alkyl           |

### Interactions between compound **3** and AChE.

| Amino acid | Non-bonding interactions                      |
|------------|-----------------------------------------------|
| Glu202     | N17, electrostatic-attractive charge          |
| His447     | H47, hydrogen bond-conventional hydrogen bond |
| Tyr124     | H56, hydrogen bond-conventional hydrogen bond |
| His447     | H48, hydrogen bond-carbon hydrogen bond       |
| Trp86      | N17, electrostatic- $\pi$ -cation             |
| Trp86      | N17, electrostatic- $\pi$ -cation             |
| Tyr337     | N17, electrostatic- $\pi$ -cation             |

|        |                                               |
|--------|-----------------------------------------------|
| Tyr341 | N25, electrostatic- $\pi$ -cation             |
| Trp86  | <b>3</b> , hydrophobic- $\pi$ - $\pi$ stacked |
| Trp86  | <b>3</b> , hydrophobic- $\pi$ - $\pi$ stacked |
| Trp86  | <b>3</b> , hydrophobic- $\pi$ - $\pi$ stacked |
| Trp86  | <b>3</b> , hydrophobic- $\pi$ - $\pi$ stacked |
| Phe338 | <b>3</b> , hydrophobic- $\pi$ - $\pi$ stacked |
| Ile451 | C121, hydrophobic-alkyl                       |
| Tyr72  | <b>3</b> , hydrophobic- $\pi$ -alkyl          |
| Trp86  | C121, hydrophobic- $\pi$ -alkyl               |
| Tyr124 | C7, hydrophobic- $\pi$ -alkyl                 |
| Tyr124 | <b>3</b> , hydrophobic- $\pi$ -alkyl          |
| Tyr133 | C121, hydrophobic- $\pi$ -alkyl               |

Interactions between compound **4** and AChE.

| Amino acid | Non-bonding interactions                                     |
|------------|--------------------------------------------------------------|
| HOH708     | H35, hydrogen bond-water hydrogen bond; carbon hydrogen bond |
| Ser203     | H65, hydrogen bond-conventional hydrogen bond                |
| His447     | N29, electrostatic- $\pi$ -cation                            |
| Trp86      | H54, hydrophobic- $\pi$ -sigma                               |
| His447     | H68, hydrophobic- $\pi$ -sigma                               |
| Tyr72      | <b>4</b> , hydrophobic- $\pi$ - $\pi$ T-shaped               |
| Tyr124     | <b>4</b> , hydrophobic- $\pi$ - $\pi$ T-shaped               |
| Leu289     | C111, hydrophobic-alkyl                                      |
| Trp86      | C25, hydrophobic- $\pi$ -alkyl                               |
| Trp86      | <b>4</b> , hydrophobic- $\pi$ -alkyl                         |
| Trp86      | <b>4</b> , hydrophobic- $\pi$ -alkyl                         |
| Trp86      | C25, hydrophobic- $\pi$ -alkyl                               |
| Trp86      | <b>4</b> , hydrophobic- $\pi$ -alkyl                         |
| Trp286     | C111, hydrophobic- $\pi$ -alkyl                              |
| Tyr337     | <b>4</b> , hydrophobic- $\pi$ -alkyl                         |

Interactions between compound **5** and AChE.

| Amino acid | Non-bonding interactions                      |
|------------|-----------------------------------------------|
| Tyr124     | H71, hydrogen bond-conventional hydrogen bond |
| Asp74      | H45, hydrogen bond-carbon hydrogen bond       |
| Tyr72      | N7, electrostatic- $\pi$ -cation              |
| Trp286     | N7, electrostatic- $\pi$ -cation              |
| Trp286     | N7, electrostatic- $\pi$ -cation              |
| Trp286     | <b>5</b> , hydrophobic- $\pi$ - $\pi$ stacked |
| Trp286     | <b>5</b> , hydrophobic- $\pi$ - $\pi$ stacked |
| Trp286     | <b>5</b> , hydrophobic- $\pi$ - $\pi$ stacked |
| Trp286     | <b>5</b> , hydrophobic- $\pi$ - $\pi$ stacked |
| Tyr72      | C111, hydrophobic- $\pi$ -alkyl               |
| Trp86      | <b>5</b> , hydrophobic- $\pi$ -alkyl          |
| Trp86      | C27, hydrophobic- $\pi$ -alkyl                |
| Trp86      | <b>5</b> , hydrophobic- $\pi$ -alkyl          |
| Trp86      | C27, hydrophobic- $\pi$ -alkyl                |
| Tyr124     | C111, hydrophobic- $\pi$ -alkyl               |
| Tyr337     | <b>5</b> , hydrophobic- $\pi$ -alkyl          |
| Phe338     | <b>5</b> , hydrophobic- $\pi$ -alkyl          |
| His447     | C27, hydrophobic- $\pi$ -alkyl                |

|        |                              |
|--------|------------------------------|
| His447 | 5, hydrophobic- $\pi$ -alkyl |
|--------|------------------------------|

Interactions between compound **6** and AChE.

| Amino acid | Non-bonding interactions                                                                       |
|------------|------------------------------------------------------------------------------------------------|
| HOH752     | F2, hydrogen bond; halogen-water hydrogen bond; conventional hydrogen bond; halogen (flourine) |
| HOH772     | F2, hydrogen bond; halogen-water hydrogen bond; conventional hydrogen bond; halogen (flourine) |
| HOH809     | H56, hydrogen bond-water hydrogen bond; conventional hydrogen bond                             |
| Ser203     | H48, hydrogen bond-conventional hydrogen bond                                                  |
| Tyr124     | H57, hydrogen bond-conventional hydrogen bond                                                  |
| Gly120     | F4, halogen-halogen (fluorine)                                                                 |
| Glu202     | F3, halogen-halogen (fluorine)                                                                 |
| Glu202     | F4, halogen-halogen (fluorine)                                                                 |
| Tyr341     | N28, electrostatic- $\pi$ -cation                                                              |
| Tyr124     | H33, hydrophobic- $\pi$ -sigma                                                                 |
| Trp86      | <b>6</b> , hydrophobic- $\pi$ - $\pi$ T-shaped                                                 |
| Trp86      | <b>6</b> , hydrophobic- $\pi$ - $\pi$ T-shaped                                                 |
| Trp86      | C1, hydrophobic- $\pi$ -alkyl                                                                  |
| Trp86      | C1, hydrophobic- $\pi$ -alkyl                                                                  |

Interactions between compound **7** and AChE.

| Amino acid | Non-bonding interactions                                                  |
|------------|---------------------------------------------------------------------------|
| Glu202     | N21, electrostatic-attractive charge                                      |
| Asp74      | N29, electrostatic-attractive charge                                      |
| Gly122     | F1, hydrogen bond; halogen-conventional hydrogen bond; halogen (flourine) |
| Ala204     | F1, hydrogen bond; halogen-conventional hydrogen bond; halogen (flourine) |
| Asp74      | H59, hydrogen bond-conventional hydrogen bond                             |
| Asp74      | H60, hydrogen bond-conventional hydrogen bond                             |
| Gly122     | F1, hydrogen bond; halogen-carbon hydrogen bond; halogen (flourine)       |
| Ser203     | F1, hydrogen bond-carbon hydrogen bond                                    |
| Tyr124     | H54, hydrogen bond-carbon hydrogen bond                                   |
| Tyr124     | H58, hydrogen bond-carbon hydrogen bond                                   |
| His447     | F3, halogen-halogen (fluorine)                                            |
| His447     | N21, electrostatic- $\pi$ -cation                                         |
| Tyr341     | N29, electrostatic- $\pi$ -cation                                         |
| Trp86      | <b>7</b> , hydrophobic- $\pi$ - $\pi$ T-shaped                            |
| Trp86      | <b>7</b> , hydrophobic- $\pi$ - $\pi$ T-shaped                            |
| Phe338     | <b>7</b> , hydrophobic- $\pi$ - $\pi$ T-shaped                            |
| Phe338     | <b>7</b> , hydrophobic- $\pi$ - $\pi$ T-shaped                            |
| His447     | <b>7</b> , hydrophobic- $\pi$ - $\pi$ T-shaped                            |
| His447     | <b>7</b> , hydrophobic- $\pi$ - $\pi$ T-shaped                            |
| Trp286     | C11, hydrophobic- $\pi$ -alkyl                                            |
| Trp286     | <b>7</b> , hydrophobic- $\pi$ -alkyl                                      |
| Trp286     | C11, hydrophobic- $\pi$ -alkyl                                            |
| Trp286     | <b>7</b> , hydrophobic- $\pi$ -alkyl                                      |
| Phe295     | C2, hydrophobic- $\pi$ -alkyl                                             |
| Phe297     | C2, hydrophobic- $\pi$ -alkyl                                             |

Interactions between compound **8** and AChE.

| Amino acid | Non-bonding interactions                                     |
|------------|--------------------------------------------------------------|
| Glu202     | N15, electrostatic-attractive charge                         |
| HOH715     | H32, hydrogen bond-water hydrogen bond; carbon hydrogen bond |
| Tyr124     | H39, hydrogen bond-conventional hydrogen bond                |
| Asp74      | H37, hydrogen bond-carbon hydrogen bond                      |
| Asp74      | H41, hydrogen bond-carbon hydrogen bond                      |
| Tyr341     | N15, electrostatic- $\pi$ -cation                            |
| Trp286     | <b>8</b> , hydrophobic- $\pi$ - $\pi$ stacked                |
| Trp286     | <b>8</b> , hydrophobic- $\pi$ - $\pi$ stacked                |
| Trp286     | <b>8</b> , hydrophobic- $\pi$ - $\pi$ stacked                |
| Trp286     | <b>8</b> , hydrophobic- $\pi$ - $\pi$ stacked                |
| Trp86      | <b>8</b> , hydrophobic- $\pi$ -alkyl                         |
| Tyr124     | C24, hydrophobic- $\pi$ -alkyl                               |
| Trp286     | C111, hydrophobic- $\pi$ -alkyl                              |
| Tyr337     | <b>8</b> , hydrophobic- $\pi$ -alkyl                         |
| Tyr337     | <b>8</b> , hydrophobic- $\pi$ -alkyl                         |
| Phe338     | <b>8</b> , hydrophobic- $\pi$ -alkyl                         |
| His447     | <b>8</b> , hydrophobic- $\pi$ -alkyl                         |

Interactions between compound **9** and AChE.

| Amino acid | Non-bonding interactions                      |
|------------|-----------------------------------------------|
| Tyr341     | H43, hydrogen bond-conventional hydrogen bond |
| Asp74      | <b>9</b> , electrostatic- $\pi$ -anion        |
| Trp286     | <b>9</b> , hydrophobic- $\pi$ - $\pi$ stacked |
| Trp286     | <b>9</b> , hydrophobic- $\pi$ - $\pi$ stacked |
| Trp286     | <b>9</b> , hydrophobic- $\pi$ - $\pi$ stacked |
| Trp286     | <b>9</b> , hydrophobic- $\pi$ - $\pi$ stacked |
| Tyr124     | C111, hydrophobic- $\pi$ -alkyl               |
| Tyr341     | C111, hydrophobic- $\pi$ -alkyl               |

Interactions between compound **10** and AChE.

| Amino acid | Non-bonding interactions                                                  |
|------------|---------------------------------------------------------------------------|
| HOH784     | <b>10</b> , hydrogen bond-water hydrogen bond; $\pi$ -donor hydrogen bond |
| HOH787     | H46, hydrogen bond-water hydrogen bond; carbon hydrogen bond              |
| Trp86      | N7, electrostatic- $\pi$ -cation                                          |
| Trp286     | N15, electrostatic- $\pi$ -cation                                         |
| Trp86      | <b>10</b> , hydrophobic- $\pi$ - $\pi$ T-shaped                           |
| Tyr337     | <b>10</b> , hydrophobic- $\pi$ - $\pi$ T-shaped                           |
| Leu76      | <b>10</b> , hydrophobic-alkyl                                             |
| Tyr72      | C34, hydrophobic- $\pi$ -alkyl                                            |
| Tyr72      | <b>10</b> , hydrophobic- $\pi$ -alkyl                                     |
| Trp286     | <b>10</b> , hydrophobic- $\pi$ -alkyl                                     |
| His287     | <b>10</b> , hydrophobic- $\pi$ -alkyl                                     |
| His447     | C111, hydrophobic- $\pi$ -alkyl                                           |

Interactions between compound **11** and AChE.

| Amino acid | Non-bonding interactions                                                     |
|------------|------------------------------------------------------------------------------|
| Trp286     | H60, hydrogen bond; electrostatic- $\pi$ -cation; $\pi$ -donor hydrogen bond |
| Trp286     | H60, hydrogen bond; electrostatic- $\pi$ -cation; $\pi$ -donor hydrogen bond |

|        |                                         |
|--------|-----------------------------------------|
| Trp86  | 11, hydrophobic- $\pi$ - $\pi$ T-shaped |
| Trp86  | 11, hydrophobic- $\pi$ - $\pi$ T-shaped |
| Phe338 | 11, hydrophobic- $\pi$ - $\pi$ T-shaped |
| Tyr72  | 11, hydrophobic- $\pi$ -alkyl           |
| Trp86  | C111, hydrophobic- $\pi$ -alkyl         |
| Trp86  | C111, hydrophobic- $\pi$ -alkyl         |
| His287 | C26, hydrophobic- $\pi$ -alkyl          |
| His447 | C111, hydrophobic- $\pi$ -alkyl         |

Interactions between compound **12** and AChE.

| Amino acid | Non-bonding interactions                                           |
|------------|--------------------------------------------------------------------|
| Asp74      | N25, electrostatic-attractive charge                               |
| HOH809     | H54, hydrogen bond-water hydrogen bond; conventional hydrogen bond |
| His447     | H47, hydrogen bond-conventional hydrogen bond                      |
| Tyr124     | H53, hydrogen bond-conventional hydrogen bond                      |
| His447     | H48, hydrogen bond-carbon hydrogen bond                            |
| Tyr124     | H50, hydrogen bond-carbon hydrogen bond                            |
| Tyr341     | N25, electrostatic- $\pi$ -cation                                  |
| Trp86      | 12, hydrophobic- $\pi$ - $\pi$ stacked                             |
| Trp86      | 12, hydrophobic- $\pi$ - $\pi$ stacked                             |
| Trp86      | 12, hydrophobic- $\pi$ - $\pi$ stacked                             |
| Trp86      | 12, hydrophobic- $\pi$ - $\pi$ stacked                             |
| Phe338     | 12, hydrophobic- $\pi$ - $\pi$ stacked                             |
| His447     | 12, hydrophobic- $\pi$ - $\pi$ T-shaped                            |
| Ile451     | C121, hydrophobic-alkyl                                            |
| Tyr72      | C7, hydrophobic- $\pi$ -alkyl                                      |
| Tyr72      | 12, hydrophobic- $\pi$ -alkyl                                      |
| Trp86      | C121, hydrophobic- $\pi$ -alkyl                                    |
| Tyr124     | 12, hydrophobic- $\pi$ -alkyl                                      |
| Tyr133     | C121, hydrophobic- $\pi$ -alkyl                                    |
| Trp286     | C7, hydrophobic- $\pi$ -alkyl                                      |
| Trp286     | 12, hydrophobic- $\pi$ -alkyl                                      |
| Tyr337     | C27, hydrophobic- $\pi$ -alkyl                                     |
| Tyr341     | C27, hydrophobic- $\pi$ -alkyl                                     |

Interactions between compound **13** and AChE.

| Amino acid | Non-bonding interactions                                           |
|------------|--------------------------------------------------------------------|
| Asp74      | H50, hydrogen bond; electrostatic-salt bridge; attractive charge   |
| Glu202     | N28, electrostatic-attractive charge                               |
| HOH869     | H50, hydrogen bond-water hydrogen bond; conventional hydrogen bond |
| Ser203     | H57, hydrogen bond-conventional hydrogen bond                      |
| Tyr341     | N21, electrostatic- $\pi$ -cation                                  |
| Trp286     | 13, hydrophobic- $\pi$ - $\pi$ stacked                             |
| Tyr341     | 13, hydrophobic- $\pi$ - $\pi$ stacked                             |
| Tyr341     | 13, hydrophobic- $\pi$ - $\pi$ stacked                             |
| Tyr124     | 13, hydrophobic- $\pi$ - $\pi$ T-shaped                            |
| Tyr124     | 13, hydrophobic- $\pi$ - $\pi$ T-shaped                            |
| Trp86      | 13, hydrophobic- $\pi$ -alkyl                                      |

|        |                                       |
|--------|---------------------------------------|
| Trp286 | C1, hydrophobic- $\pi$ -alkyl         |
| Trp286 | C1, hydrophobic- $\pi$ -alkyl         |
| Phe295 | C30, hydrophobic- $\pi$ -alkyl        |
| Phe297 | C30, hydrophobic- $\pi$ -alkyl        |
| Tyr337 | C11, hydrophobic- $\pi$ -alkyl        |
| Tyr337 | <b>13</b> , hydrophobic- $\pi$ -alkyl |
| Phe338 | C30, hydrophobic- $\pi$ -alkyl        |
| Tyr341 | C1, hydrophobic- $\pi$ -alkyl         |
| His447 | C11, hydrophobic- $\pi$ -alkyl        |

Interactions between compound **14** and AChE.

| Amino acid | Non-bonding interactions                                     |
|------------|--------------------------------------------------------------|
| Asp74      | N25, electrostatic-attractive charge                         |
| HOH809     | H61, hydrogen bond-water hydrogen bond; carbon hydrogen bond |
| Glu202     | H48, hydrogen bond-conventional hydrogen bond                |
| Tyr124     | H51, hydrogen bond-carbon hydrogen bond                      |
| Asp74      | H57, hydrogen bond-carbon hydrogen bond                      |
| Tyr124     | H62, hydrogen bond-carbon hydrogen bond                      |
| Tyr341     | N25, electrostatic- $\pi$ -cation                            |
| Trp86      | <b>14</b> , hydrogen bond- $\pi$ -donor hydrogen bond        |
| Trp86      | <b>14</b> , hydrophobic- $\pi$ - $\pi$ stacked               |
| Trp86      | <b>14</b> , hydrophobic- $\pi$ - $\pi$ stacked               |
| Tyr337     | <b>14</b> , hydrophobic- $\pi$ - $\pi$ T-shaped              |
| Met85      | C121, hydrophobic-alkyl                                      |
| Trp86      | C21, hydrophobic- $\pi$ -alkyl                               |
| Trp86      | C21, hydrophobic- $\pi$ -alkyl                               |
| Tyr124     | <b>14</b> , hydrophobic- $\pi$ -alkyl                        |
| Trp286     | C7, hydrophobic- $\pi$ -alkyl                                |
| Phe297     | C27, hydrophobic- $\pi$ -alkyl                               |
| Phe338     | C27, hydrophobic- $\pi$ -alkyl                               |
| Tyr449     | C121, hydrophobic- $\pi$ -alkyl                              |

Interactions between compound **15** and AChE.

| Amino acid | Non-bonding interactions                                         |
|------------|------------------------------------------------------------------|
| Asp74      | H55, hydrogen bond; electrostatic-salt bridge; attractive charge |
| Glu202     | N17, electrostatic-attractive charge                             |
| His447     | H48, hydrogen bond-conventional hydrogen bond                    |
| His447     | H49, hydrogen bond-carbon hydrogen bond                          |
| Trp86      | N17, electrostatic- $\pi$ -cation                                |
| Trp86      | N17, electrostatic- $\pi$ -cation                                |
| Tyr337     | N17, electrostatic- $\pi$ -cation                                |
| Tyr341     | N24, electrostatic- $\pi$ -cation                                |
| Trp86      | <b>15</b> , hydrophobic- $\pi$ - $\pi$ stacked                   |
| Trp86      | <b>15</b> , hydrophobic- $\pi$ - $\pi$ stacked                   |
| Trp86      | <b>15</b> , hydrophobic- $\pi$ - $\pi$ stacked                   |
| Trp86      | <b>15</b> , hydrophobic- $\pi$ - $\pi$ stacked                   |
| Tyr337     | <b>15</b> , hydrophobic- $\pi$ - $\pi$ T-shaped                  |
| Tyr124     | <b>15</b> , hydrophobic- $\pi$ -alkyl                            |
| Trp286     | C7, hydrophobic- $\pi$ -alkyl                                    |

Interactions between compound **16** and AChE.

| Amino acid | Non-bonding interactions                                     |
|------------|--------------------------------------------------------------|
| Glu202     | N17, electrostatic-attractive charge                         |
| HOH809     | H62, hydrogen bond-water hydrogen bond; carbon hydrogen bond |
| His447     | H49, hydrogen bond-conventional hydrogen bond                |
| His447     | H50, hydrogen bond-carbon hydrogen bond                      |
| Tyr124     | H64, hydrogen bond-carbon hydrogen bond                      |
| Trp86      | N17, electrostatic- $\pi$ -cation                            |
| Trp86      | N17, electrostatic- $\pi$ -cation                            |
| Tyr337     | N17, electrostatic- $\pi$ -cation                            |
| Trp86      | <b>16</b> , hydrophobic- $\pi$ - $\pi$ stacked               |
| Trp86      | <b>16</b> , hydrophobic- $\pi$ - $\pi$ stacked               |
| Trp86      | <b>16</b> , hydrophobic- $\pi$ - $\pi$ stacked               |
| Trp86      | <b>16</b> , hydrophobic- $\pi$ - $\pi$ stacked               |
| Tyr337     | <b>16</b> , hydrophobic- $\pi$ - $\pi$ T-shaped              |
| His447     | <b>16</b> , hydrophobic- $\pi$ - $\pi$ T-shaped              |
| Tyr72      | <b>16</b> , hydrophobic- $\pi$ -alkyl                        |
| Trp286     | <b>16</b> , hydrophobic- $\pi$ -alkyl                        |

Interactions between compound **17** and AChE.

| Amino acid | Non-bonding interactions                        |
|------------|-------------------------------------------------|
| Trp286     | N17, electrostatic- $\pi$ -cation               |
| Trp286     | N17, electrostatic- $\pi$ -cation               |
| His447     | H45, hydrophobic- $\pi$ -sigma                  |
| Tyr124     | KBK15, other- $\pi$ -lone pair                  |
| Trp286     | <b>17</b> , hydrophobic- $\pi$ - $\pi$ stacked  |
| Trp286     | <b>17</b> , hydrophobic- $\pi$ - $\pi$ stacked  |
| Trp286     | <b>17</b> , hydrophobic- $\pi$ - $\pi$ stacked  |
| Trp286     | <b>17</b> , hydrophobic- $\pi$ - $\pi$ stacked  |
| Tyr124     | <b>17</b> , hydrophobic- $\pi$ - $\pi$ T-shaped |
| Trp86      | <b>17</b> , hydrophobic- $\pi$ -alkyl           |
| Trp86      | C7, hydrophobic- $\pi$ -alkyl                   |
| Trp86      | <b>17</b> , hydrophobic- $\pi$ -alkyl           |
| Trp86      | <b>17</b> , hydrophobic- $\pi$ -alkyl           |
| Trp86      | C7, hydrophobic- $\pi$ -alkyl                   |
| Trp86      | <b>17</b> , hydrophobic- $\pi$ -alkyl           |
| Tyr337     | <b>17</b> , hydrophobic- $\pi$ -alkyl           |
| His447     | <b>17</b> , hydrophobic- $\pi$ -alkyl           |

Interactions between compound **18** and AChE.

| Amino acid | Non-bonding interactions                                     |
|------------|--------------------------------------------------------------|
| Asp74      | N17, electrostatic-attractive charge                         |
| HOH708     | H50, hydrogen bond-water hydrogen bond; carbon hydrogen bond |
| Trp286     | <b>18</b> , hydrophobic- $\pi$ - $\pi$ stacked               |
| Trp286     | <b>18</b> , hydrophobic- $\pi$ - $\pi$ stacked               |
| Trp286     | <b>18</b> , hydrophobic- $\pi$ - $\pi$ stacked               |
| Trp286     | <b>18</b> , hydrophobic- $\pi$ - $\pi$ stacked               |
| Tyr341     | <b>18</b> , hydrophobic- $\pi$ - $\pi$ stacked               |
| Tyr124     | <b>18</b> , hydrophobic- $\pi$ - $\pi$ T-shaped              |
| Trp86      | <b>18</b> , hydrophobic- $\pi$ -alkyl                        |
| Trp86      | C7, hydrophobic- $\pi$ -alkyl                                |
| Trp86      | <b>18</b> , hydrophobic- $\pi$ -alkyl                        |

|        |                                       |
|--------|---------------------------------------|
| Trp86  | <b>18</b> , hydrophobic- $\pi$ -alkyl |
| Trp86  | C7, hydrophobic- $\pi$ -alkyl         |
| Trp86  | <b>18</b> , hydrophobic- $\pi$ -alkyl |
| Trp286 | Cl22, hydrophobic- $\pi$ -alkyl       |
| Tyr337 | <b>18</b> , hydrophobic- $\pi$ -alkyl |
| His447 | C7, hydrophobic- $\pi$ -alkyl         |

Interactions between compound **19** and AChE.

| Amino acid | Non-bonding interactions                        |
|------------|-------------------------------------------------|
| Glu202     | N17, electrostatic-attractive charge            |
| His447     | H54, hydrogen bond-conventional hydrogen bond   |
| Asp74      | H61, hydrogen bond-conventional hydrogen bond   |
| His447     | H54, hydrogen bond-carbon hydrogen bond         |
| Trp86      | N17, electrostatic- $\pi$ -cation               |
| Trp86      | N17, electrostatic- $\pi$ -cation               |
| Tyr124     | <b>19</b> , other- $\pi$ -lone pair             |
| Trp86      | <b>19</b> , hydrophobic- $\pi$ - $\pi$ stacked  |
| Trp86      | <b>19</b> , hydrophobic- $\pi$ - $\pi$ stacked  |
| Trp86      | <b>19</b> , hydrophobic- $\pi$ - $\pi$ stacked  |
| Trp86      | <b>19</b> , hydrophobic- $\pi$ - $\pi$ stacked  |
| Tyr124     | <b>19</b> , hydrophobic- $\pi$ - $\pi$ T-shaped |
| His447     | <b>19</b> , hydrophobic- $\pi$ - $\pi$ T-shaped |
| Trp86      | Cl22, hydrophobic- $\pi$ -alkyl                 |
| Tyr133     | Cl22, hydrophobic- $\pi$ -alkyl                 |
| Trp286     | C7, hydrophobic- $\pi$ -alkyl                   |
| Trp286     | <b>19</b> , hydrophobic- $\pi$ -alkyl           |
| Trp286     | <b>19</b> , hydrophobic- $\pi$ -alkyl           |

Interactions between compound **20** and AChE.

| Amino acid | Non-bonding interactions                                     |
|------------|--------------------------------------------------------------|
| Glu202     | N1, electrostatic-attractive charge                          |
| HOH809     | H39, hydrogen bond-water hydrogen bond; carbon hydrogen bond |
| His447     | H29, hydrogen bond-conventional hydrogen bond                |
| Asp74      | H37, hydrogen bond-carbon hydrogen bond                      |
| Tyr124     | H42, hydrogen bond-carbon hydrogen bond                      |
| Trp86      | N1, electrostatic- $\pi$ -cation                             |
| Trp86      | N1, electrostatic- $\pi$ -cation                             |
| Tyr337     | N1, electrostatic- $\pi$ -cation                             |
| Trp86      | <b>20</b> , hydrophobic- $\pi$ - $\pi$ stacked               |
| Trp86      | <b>20</b> , hydrophobic- $\pi$ - $\pi$ stacked               |
| Trp86      | <b>20</b> , hydrophobic- $\pi$ - $\pi$ stacked               |
| Trp86      | <b>20</b> , hydrophobic- $\pi$ - $\pi$ stacked               |
| Phe338     | <b>20</b> , hydrophobic- $\pi$ - $\pi$ stacked               |
| Tyr72      | C26, hydrophobic- $\pi$ -alkyl                               |
| Trp86      | Cl28, hydrophobic- $\pi$ -alkyl                              |
| Tyr124     | <b>20</b> , hydrophobic- $\pi$ -alkyl                        |
| Tyr341     | <b>20</b> , hydrophobic- $\pi$ -alkyl                        |

Interactions between compound **21** and AChE.

| Amino acid | Non-bonding interactions             |
|------------|--------------------------------------|
| Glu202     | N17, electrostatic-attractive charge |

|        |                                                 |
|--------|-------------------------------------------------|
| Tyr124 | N25, hydrogen bond-conventional hydrogen bond   |
| His447 | H48, hydrogen bond-conventional hydrogen bond   |
| His447 | H49, hydrogen bond-carbon hydrogen bond         |
| Trp86  | N17, electrostatic- $\pi$ -cation               |
| Trp86  | N17, electrostatic- $\pi$ -cation               |
| Tyr337 | N17, electrostatic- $\pi$ -cation               |
| Trp86  | <b>21</b> , hydrophobic- $\pi$ - $\pi$ stacked  |
| Trp86  | <b>21</b> , hydrophobic- $\pi$ - $\pi$ stacked  |
| Trp86  | <b>21</b> , hydrophobic- $\pi$ - $\pi$ stacked  |
| Trp86  | <b>21</b> , hydrophobic- $\pi$ - $\pi$ stacked  |
| Phe338 | <b>21</b> , hydrophobic- $\pi$ - $\pi$ stacked  |
| Tyr337 | <b>21</b> , hydrophobic- $\pi$ - $\pi$ T-shaped |
| His447 | <b>21</b> , hydrophobic- $\pi$ - $\pi$ T-shaped |
| Tyr72  | <b>21</b> , hydrophobic- $\pi$ -alkyl           |
| Trp86  | Cl22, hydrophobic- $\pi$ -alkyl                 |
| Trp286 | <b>21</b> , hydrophobic- $\pi$ -alkyl           |
| Tyr337 | <b>21</b> , hydrophobic- $\pi$ -alkyl           |

Interactions between compound **22** and AChE.

| Amino acid | Non-bonding interactions                                           |
|------------|--------------------------------------------------------------------|
| HOH883     | H55, hydrogen bond-water hydrogen bond; conventional hydrogen bond |
| HOH883     | H56, hydrogen bond-water hydrogen bond; carbon hydrogen bond       |
| HOH708     | H71, hydrogen bond-water hydrogen bond; carbon hydrogen bond       |
| Tyr337     | H79, hydrogen bond-conventional hydrogen bond                      |
| Tyr124     | H80, hydrogen bond-conventional hydrogen bond                      |
| Tyr124     | H77, hydrogen bond-carbon hydrogen bond                            |
| Tyr124     | H80, hydrogen bond-carbon hydrogen bond                            |
| Trp286     | <b>22</b> , hydrophobic- $\pi$ - $\pi$ stacked                     |
| Trp286     | <b>22</b> , hydrophobic- $\pi$ - $\pi$ stacked                     |
| Trp286     | <b>22</b> , hydrophobic- $\pi$ - $\pi$ stacked                     |
| Tyr72      | <b>22</b> , hydrophobic- $\pi$ - $\pi$ T-shaped                    |
| Trp86      | <b>22</b> , hydrophobic- $\pi$ -alkyl                              |
| Trp86      | <b>22</b> , hydrophobic- $\pi$ -alkyl                              |
| Trp86      | <b>22</b> , hydrophobic- $\pi$ -alkyl                              |
| Trp86      | C7, hydrophobic- $\pi$ -alkyl                                      |
| Trp86      | <b>22</b> , hydrophobic- $\pi$ -alkyl                              |
| Tyr124     | Cl22, hydrophobic- $\pi$ -alkyl                                    |
| Phe297     | Cl22, hydrophobic- $\pi$ -alkyl                                    |
| Tyr337     | <b>22</b> , hydrophobic- $\pi$ -alkyl                              |
| Tyr341     | <b>22</b> , hydrophobic- $\pi$ -alkyl                              |
| Phe297     | <b>22</b> , hydrophobic- $\pi$ -alkyl                              |

Interactions between compound **23** and AChE.

| Amino acid | Non-bonding interactions                                     |
|------------|--------------------------------------------------------------|
| Glu202     | N17, electrostatic-attractive charge                         |
| HOH809     | H64, hydrogen bond-water hydrogen bond; carbon hydrogen bond |
| HOH809     | H70, hydrogen bond-water hydrogen bond; carbon hydrogen bond |
| Ser203     | H56, hydrogen bond-conventional hydrogen bond                |
| His447     | H56, hydrogen bond-conventional hydrogen bond                |
| Tyr124     | H65, hydrogen bond-carbon hydrogen bond                      |
| Asp74      | H66, hydrogen bond-carbon hydrogen bond                      |

|        |                                                                              |
|--------|------------------------------------------------------------------------------|
| Tyr72  | H83, hydrogen bond-carbon hydrogen bond                                      |
| Tyr72  | N35, electrostatic- $\pi$ -cation                                            |
| Trp286 | H80, hydrogen bond; electrostatic- $\pi$ -cation; $\pi$ -donor hydrogen bond |
| Trp86  | <b>23</b> , hydrophobic- $\pi$ - $\pi$ T-shaped                              |
| Trp86  | <b>23</b> , hydrophobic- $\pi$ - $\pi$ T-shaped                              |
| Leu76  | <b>23</b> , hydrophobic-alkyl                                                |
| Trp86  | Cl22, hydrophobic- $\pi$ -alkyl                                              |
| Trp86  | Cl22, hydrophobic- $\pi$ -alkyl                                              |
| Tyr341 | <b>23</b> , hydrophobic- $\pi$ -alkyl                                        |

### List of interactions between aminoquinolines and BChE.

Interactions between compound **1** and BChE.

| Amino acid | Non-bonding interactions                                           |
|------------|--------------------------------------------------------------------|
| Asp70      | N25, electrostatic-attractive charge                               |
| HOH825     | H53, hydrogen bond-water hydrogen bond; conventional hydrogen bond |
| Ser287     | H45, hydrogen bond-conventional hydrogen bond                      |
| Ser287     | H46, hydrogen bond-carbon hydrogen bond                            |
| Asp70      | H51, hydrogen bond-carbon hydrogen bond                            |
| Trp82      | C7, hydrophobic- $\pi$ -alkyl                                      |
| Trp82      | <b>1</b> , hydrophobic- $\pi$ -alkyl                               |
| Trp82      | C7, hydrophobic- $\pi$ -alkyl                                      |
| Trp82      | <b>1</b> , hydrophobic- $\pi$ -alkyl                               |
| Trp231     | Cl21, hydrophobic- $\pi$ -alkyl                                    |
| Trp231     | Cl21, hydrophobic- $\pi$ -alkyl                                    |
| Phe398     | Cl21, hydrophobic- $\pi$ -alkyl                                    |
| Leu286     | <b>1</b> , hydrophobic- $\pi$ -alkyl                               |

Interactions between compound **2** and BChE.

| Amino acid | Non-bonding interactions                                           |
|------------|--------------------------------------------------------------------|
| Asp70      | N26, electrostatic-attractive charge                               |
| HOH930     | H50, hydrogen bond-water hydrogen bond; carbon hydrogen bond       |
| HOH825     | H57, hydrogen bond-water hydrogen bond; conventional hydrogen bond |
| Ser287     | H46, hydrogen bond-conventional hydrogen bond                      |
| Trp82      | H34, hydrophobic- $\pi$ -sigma                                     |
| Phe329     | <b>2</b> , hydrophobic- $\pi$ - $\pi$ T-shaped                     |
| Leu286     | Cl21, hydrophobic-alkyl                                            |
| Val288     | Cl21, hydrophobic-alkyl                                            |
| Trp82      | C7, hydrophobic- $\pi$ -alkyl                                      |
| Trp82      | <b>2</b> , hydrophobic- $\pi$ -alkyl                               |
| Trp82      | <b>2</b> , hydrophobic- $\pi$ -alkyl                               |
| Trp82      | C7, hydrophobic- $\pi$ -alkyl                                      |
| Trp82      | <b>2</b> , hydrophobic- $\pi$ -alkyl                               |
| Trp231     | Cl21, hydrophobic- $\pi$ -alkyl                                    |
| Trp231     | Cl21, hydrophobic- $\pi$ -alkyl                                    |
| His438     | <b>2</b> , hydrophobic- $\pi$ -alkyl                               |

Interactions between compound **3** and BChE.

| Amino acid | Non-bonding interactions                                           |
|------------|--------------------------------------------------------------------|
| HOH825     | H56, hydrogen bond-water hydrogen bond; conventional hydrogen bond |

|        |                                                              |
|--------|--------------------------------------------------------------|
| HOH825 | H61, hydrogen bond-water hydrogen bond; carbon hydrogen bond |
| Ser287 | H47, hydrogen bond-conventional hydrogen bond                |
| Trp82  | N25, electrostatic- $\pi$ -cation                            |
| Phe329 | <b>3</b> , hydrophobic- $\pi$ - $\pi$ T-shaped               |
| Leu286 | C121, hydrophobic-alkyl                                      |
| Val288 | C121, hydrophobic-alkyl                                      |
| Trp82  | <b>3</b> , hydrophobic- $\pi$ -alkyl                         |
| Trp82  | <b>3</b> , hydrophobic- $\pi$ -alkyl                         |
| Trp231 | C21, hydrophobic- $\pi$ -alkyl                               |
| Trp231 | C21, hydrophobic- $\pi$ -alkyl                               |
| His438 | C7, hydrophobic- $\pi$ -alkyl                                |
| Leu286 | <b>3</b> , hydrophobic- $\pi$ -alkyl                         |

Interactions between compound **4** and BChE.

| Amino acid | Non-bonding interactions                      |
|------------|-----------------------------------------------|
| Asp70      | N7, electrostatic-attractive charge           |
| Glu197     | N29, electrostatic-attractive charge          |
| Gln119     | H37, hydrogen bond-conventional hydrogen bond |
| Ser287     | H37, hydrogen bond-conventional hydrogen bond |
| Ser198     | H65, hydrogen bond-conventional hydrogen bond |
| Asp70      | H35, hydrogen bond-carbon hydrogen bond       |
| Pro285     | H38, hydrogen bond-carbon hydrogen bond       |
| Ser287     | H38, hydrogen bond-carbon hydrogen bond       |
| Pro285     | H39, hydrogen bond-carbon hydrogen bond       |
| Ser198     | H42, hydrogen bond-carbon hydrogen bond       |
| Trp82      | H63, hydrophobic- $\pi$ -sigma                |
| Ala277     | C111, hydrophobic-alkyl                       |
| Trp82      | <b>4</b> , hydrophobic- $\pi$ -alkyl          |
| Trp82      | C25, hydrophobic- $\pi$ -alkyl                |
| Trp82      | <b>4</b> , hydrophobic- $\pi$ -alkyl          |
| Trp82      | <b>4</b> , hydrophobic- $\pi$ -alkyl          |
| Trp82      | C25, hydrophobic- $\pi$ -alkyl                |
| His438     | <b>4</b> , hydrophobic- $\pi$ -alkyl          |

Interactions between compound **5** and BChE.

| Amino acid | Non-bonding interactions                                                     |
|------------|------------------------------------------------------------------------------|
| HOH709     | <b>5</b> , hydrogen bond-water hydrogen bond; $\pi$ -donor hydrogen bond     |
| His438     | H39, hydrogen bond-conventional hydrogen bond                                |
| Gln119     | H71, hydrogen bond-conventional hydrogen bond                                |
| His438     | H41, hydrogen bond-carbon hydrogen bond                                      |
| Pro285     | H44, hydrogen bond-carbon hydrogen bond                                      |
| Ser287     | H45, hydrogen bond-carbon hydrogen bond                                      |
| Gln119     | H73, hydrogen bond-carbon hydrogen bond                                      |
| Asp70      | C111, halogen-halogen (Cl, Br, I)                                            |
| Trp82      | N7, electrostatic- $\pi$ -cation                                             |
| Trp82      | H36, hydrogen bond; electrostatic- $\pi$ -cation; $\pi$ -donor hydrogen bond |
| Trp82      | <b>5</b> , hydrophobic- $\pi$ - $\pi$ T-shaped                               |
| Trp82      | <b>5</b> , hydrophobic- $\pi$ - $\pi$ T-shaped                               |
| Phe329     | <b>5</b> , hydrophobic- $\pi$ - $\pi$ T-shaped                               |
| Tyr332     | C111, hydrophobic- $\pi$ -alkyl                                              |

Interactions between compound **7** and BChE.

| Amino acid | Non-bonding interactions                                            |
|------------|---------------------------------------------------------------------|
| Ser287     | H49, hydrogen bond-conventional hydrogen bond                       |
| Gly117     | F3, hydrogen bond; halogen-carbon hydrogen bond; halogen (fluorine) |
| Trp82      | N29, electrostatic- $\pi$ -cation                                   |
| Trp82      | H32, hydrophobic- $\pi$ -sigma                                      |
| Phe329     | <b>7</b> , hydrophobic- $\pi$ - $\pi$ T-shaped                      |
| Leu286     | C2, hydrophobic-alkyl                                               |
| Val288     | C2, hydrophobic-alkyl                                               |
| Trp82      | <b>7</b> , hydrophobic- $\pi$ -alkyl                                |
| Trp82      | <b>7</b> , hydrophobic- $\pi$ -alkyl                                |
| Trp82      | <b>7</b> , hydrophobic- $\pi$ -alkyl                                |
| Trp231     | C2, hydrophobic- $\pi$ -alkyl                                       |
| Trp231     | C2, hydrophobic- $\pi$ -alkyl                                       |
| His438     | <b>7</b> , hydrophobic- $\pi$ -alkyl                                |
| Leu286     | <b>7</b> , hydrophobic- $\pi$ -alkyl                                |

Interactions between compound **8** and BChE.

| Amino acid | Non-bonding interactions                                     |
|------------|--------------------------------------------------------------|
| Asp70      | N15, electrostatic-attractive charge                         |
| HOH930     | H34, hydrogen bond-water hydrogen bond; carbon hydrogen bond |
| HOH910     | H41, hydrogen bond-water hydrogen bond; carbon hydrogen bond |
| Ser287     | H31, hydrogen bond-conventional hydrogen bond                |
| Asp70      | H39, hydrogen bond-conventional hydrogen bond                |
| Asp70      | H35, hydrogen bond-carbon hydrogen bond                      |
| Asp70      | H37, hydrogen bond-carbon hydrogen bond                      |
| Phe329     | DO280, hydrophobic- $\pi$ - $\pi$ T-shaped                   |
| Leu286     | Cl11, hydrophobic-alkyl                                      |
| Val288     | Cl11, hydrophobic-alkyl                                      |
| Trp82      | C24, hydrophobic- $\pi$ -alkyl                               |
| Trp82      | <b>8</b> , hydrophobic- $\pi$ -alkyl                         |
| Trp82      | <b>8</b> , hydrophobic- $\pi$ -alkyl                         |
| Trp82      | C24, hydrophobic- $\pi$ -alkyl                               |
| Trp82      | <b>8</b> , hydrophobic- $\pi$ -alkyl                         |
| Trp231     | Cl11, hydrophobic- $\pi$ -alkyl                              |
| Trp231     | Cl11, hydrophobic- $\pi$ -alkyl                              |
| His438     | <b>8</b> , hydrophobic- $\pi$ -alkyl                         |

Interactions between compound **9** and BChE.

| Amino acid | Non-bonding interactions                                     |
|------------|--------------------------------------------------------------|
| HOH1031    | H46, hydrogen bond-water hydrogen bond; carbon hydrogen bond |
| Ser287     | H45, hydrogen bond-conventional hydrogen bond                |
| Ser287     | H46, hydrogen bond-carbon hydrogen bond                      |
| Thr284     | H49, hydrogen bond-carbon hydrogen bond                      |
| Phe329     | <b>9</b> , hydrophobic- $\pi$ - $\pi$ T-shaped               |
| Ala277     | <b>9</b> , hydrophobic-alkyl                                 |
| Pro285     | <b>9</b> , hydrophobic-alkyl                                 |
| Leu286     | Cl11, hydrophobic-alkyl                                      |
| Trp231     | Cl11, hydrophobic- $\pi$ -alkyl                              |
| Trp231     | Cl11, hydrophobic- $\pi$ -alkyl                              |

|        |                                 |
|--------|---------------------------------|
| Phe398 | C111, hydrophobic- $\pi$ -alkyl |
| Leu286 | 9, hydrophobic- $\pi$ -alkyl    |

Interactions between compound **10** and BChE.

| Amino acid | Non-bonding interactions                                           |
|------------|--------------------------------------------------------------------|
| HOH897     | H45, hydrogen bond-water hydrogen bond; conventional hydrogen bond |
| HOH930     | H91, hydrogen bond-water hydrogen bond; carbon hydrogen bond       |
| Gln119     | H53, hydrogen bond-conventional hydrogen bond                      |
| Ser287     | H54, hydrogen bond-carbon hydrogen bond                            |
| Pro285     | H55, hydrogen bond-carbon hydrogen bond                            |
| Gln119     | H90, hydrogen bond-carbon hydrogen bond                            |
| Trp231     | H60, hydrophobic- $\pi$ -sigma                                     |
| Leu286     | 10, hydrophobic-alkyl                                              |
| Val288     | 10, hydrophobic-alkyl                                              |
| Leu286     | 10, hydrophobic-alkyl                                              |
| Trp231     | C23, hydrophobic- $\pi$ -alkyl                                     |
| Trp231     | 10, hydrophobic- $\pi$ -alkyl                                      |
| Trp231     | 10, hydrophobic- $\pi$ -alkyl                                      |
| Trp231     | C23, hydrophobic- $\pi$ -alkyl                                     |
| Trp231     | 10, hydrophobic- $\pi$ -alkyl                                      |
| Phe329     | 10, hydrophobic- $\pi$ -alkyl                                      |
| Phe329     | C34, hydrophobic- $\pi$ -alkyl                                     |
| His438     | C34, hydrophobic- $\pi$ -alkyl                                     |

Interactions between compound **11** and BChE.

| Amino acid | Non-bonding interactions                |
|------------|-----------------------------------------|
| Ser287     | H50, hydrogen bond-carbon hydrogen bond |
| Ser287     | H51, hydrogen bond-carbon hydrogen bond |
| Trp82      | C111, hydrophobic- $\pi$ -alkyl         |

Interactions between compound **12** and BChE.

| Amino acid | Non-bonding interactions                      |
|------------|-----------------------------------------------|
| Glu197     | N25, electrostatic-attractive charge          |
| His438     | H53, hydrogen bond-conventional hydrogen bond |
| His438     | H61, hydrogen bond-carbon hydrogen bond       |
| Val288     | C27, hydrophobic-alkyl                        |
| Trp82      | C7, hydrophobic- $\pi$ -alkyl                 |
| Trp82      | 12, hydrophobic- $\pi$ -alkyl                 |
| Trp82      | 12, hydrophobic- $\pi$ -alkyl                 |
| Trp82      | C7, hydrophobic- $\pi$ -alkyl                 |
| Trp82      | 12, hydrophobic- $\pi$ -alkyl                 |
| Trp231     | C27, hydrophobic- $\pi$ -alkyl                |
| Trp231     | C27, hydrophobic- $\pi$ -alkyl                |
| His438     | 12, hydrophobic- $\pi$ -alkyl                 |

Interactions between compound **13** and BChE.

| Amino acid | Non-bonding interactions                                            |
|------------|---------------------------------------------------------------------|
| HOH825     | H57, hydrogen bond-water hydrogen bond; conventional hydrogen bond  |
| Ser287     | H50, hydrogen bond-conventional hydrogen bond                       |
| Gly117     | F2, hydrogen bond; halogen-carbon hydrogen bond; halogen (fluorine) |
| Trp82      | N28, electrostatic- $\pi$ -cation                                   |

|        |                                                 |
|--------|-------------------------------------------------|
| Phe329 | <b>13</b> , hydrophobic- $\pi$ - $\pi$ T-shaped |
| Leu286 | C1, hydrophobic-alkyl                           |
| Trp82  | <b>13</b> , hydrophobic- $\pi$ -alkyl           |
| Trp82  | <b>13</b> , hydrophobic- $\pi$ -alkyl           |
| Trp231 | C1, hydrophobic- $\pi$ -alkyl                   |
| Trp231 | C1, hydrophobic- $\pi$ -alkyl                   |
| His438 | <b>13</b> , hydrophobic- $\pi$ -alkyl           |

Interactions between compound **14** and BChE.

| Amino acid | Non-bonding interactions                                           |
|------------|--------------------------------------------------------------------|
| Asp70      | N25, electrostatic-attractive charge                               |
| HOH825     | H55, hydrogen bond-water hydrogen bond; conventional hydrogen bond |
| Trp82      | H40, hydrophobic- $\pi$ -sigma                                     |
| Phe329     | <b>14</b> , hydrophobic- $\pi$ - $\pi$ T-shaped                    |
| Leu286     | Cl21, hydrophobic-alkyl                                            |
| Val288     | C21, hydrophobic-alkyl                                             |
| Trp82      | <b>14</b> , hydrophobic- $\pi$ -alkyl                              |
| Trp82      | <b>14</b> , hydrophobic- $\pi$ -alkyl                              |
| Trp82      | <b>14</b> , hydrophobic- $\pi$ -alkyl                              |
| Trp231     | Cl21, hydrophobic- $\pi$ -alkyl                                    |
| Trp231     | Cl21, hydrophobic- $\pi$ -alkyl                                    |
| His438     | <b>14</b> , hydrophobic- $\pi$ -alkyl                              |

Interactions between compound **15** and BChE.

| Amino acid | Non-bonding interactions                                           |
|------------|--------------------------------------------------------------------|
| Asp70      | N24, electrostatic-attractive charge                               |
| HOH825     | H56, hydrogen bond-water hydrogen bond; conventional hydrogen bond |
| HOH825     | H57, hydrogen bond-water hydrogen bond; carbon hydrogen bond       |
| HOH831     | H58, hydrogen bond-water hydrogen bond; carbon hydrogen bond       |
| Ser287     | H48, hydrogen bond-conventional hydrogen bond                      |
| Ser287     | H49, hydrogen bond-carbon hydrogen bond                            |
| Asp70      | H63, hydrogen bond-carbon hydrogen bond                            |
| Trp231     | <b>15</b> , hydrophobic- $\pi$ - $\pi$ T-shaped                    |
| Trp231     | <b>15</b> , hydrophobic- $\pi$ - $\pi$ T-shaped                    |
| Trp82      | C7, hydrophobic- $\pi$ -alkyl                                      |
| Trp82      | <b>15</b> , hydrophobic- $\pi$ -alkyl                              |
| Trp82      | C7, hydrophobic- $\pi$ -alkyl                                      |
| Trp82      | <b>15</b> , hydrophobic- $\pi$ -alkyl                              |
| His438     | <b>15</b> , hydrophobic- $\pi$ -alkyl                              |
| Leu286     | <b>15</b> , hydrophobic- $\pi$ -alkyl                              |
| Leu286     | <b>15</b> , hydrophobic- $\pi$ -alkyl                              |

Interactions between compound **16** and BChE.

| Amino acid | Non-bonding interactions                                           |
|------------|--------------------------------------------------------------------|
| Asp70      | N17, electrostatic-attractive charge                               |
| HOH910     | H49, hydrogen bond-water hydrogen bond; conventional hydrogen bond |
| Pro285     | H52, hydrogen bond-conventional hydrogen bond                      |
| Trp82      | H39, hydrophobic- $\pi$ -sigma                                     |
| Tyr332     | <b>16</b> , hydrophobic- $\pi$ - $\pi$ T-shaped                    |
| Trp82      | <b>16</b> , hydrophobic- $\pi$ -alkyl                              |
| Trp82      | <b>16</b> , hydrophobic- $\pi$ -alkyl                              |

|        |                                       |
|--------|---------------------------------------|
| Trp82  | C7, hydrophobic- $\pi$ -alkyl         |
| Trp82  | <b>16</b> , hydrophobic- $\pi$ -alkyl |
| His438 | <b>16</b> , hydrophobic- $\pi$ -alkyl |

Interactions between compound **17** and BChE.

| Amino acid | Non-bonding interactions                                     |
|------------|--------------------------------------------------------------|
| HOH831     | H59, hydrogen bond-water hydrogen bond; carbon hydrogen bond |
| Ser287     | H49, hydrogen bond-conventional hydrogen bond                |
| Gln119     | H52, hydrogen bond-conventional hydrogen bond                |
| Ser287     | H50, hydrogen bond-carbon hydrogen bond                      |
| Trp82      | H42, hydrophobic- $\pi$ -sigma                               |
| Phe329     | <b>17</b> , hydrophobic- $\pi$ - $\pi$ T-shaped              |
| Trp82      | <b>17</b> , hydrophobic- $\pi$ -alkyl                        |
| Trp82      | C7, hydrophobic- $\pi$ -alkyl                                |
| Trp231     | Cl22, hydrophobic- $\pi$ -alkyl                              |
| Trp231     | Cl22, hydrophobic- $\pi$ -alkyl                              |
| His438     | <b>17</b> , hydrophobic- $\pi$ -alkyl                        |
| His438     | <b>17</b> , hydrophobic- $\pi$ -alkyl                        |

Interactions between compound **18** and BChE.

| Amino acid | Non-bonding interactions                                           |
|------------|--------------------------------------------------------------------|
| HOH989     | H49, hydrogen bond-water hydrogen bond; conventional hydrogen bond |
| HOH1024    | H49, hydrogen bond-water hydrogen bond; conventional hydrogen bond |
| Ser287     | H52, hydrogen bond-conventional hydrogen bond                      |
| Ser198     | H59, hydrogen bond-carbon hydrogen bond                            |
| Trp82      | H40, hydrophobic- $\pi$ -sigma                                     |
| Trp231     | <b>18</b> , hydrophobic- $\pi$ - $\pi$ T-shaped                    |
| Phe329     | <b>18</b> , hydrophobic- $\pi$ - $\pi$ T-shaped                    |
| Trp82      | <b>18</b> , hydrophobic- $\pi$ -alkyl                              |
| Trp82      | C7, hydrophobic- $\pi$ -alkyl                                      |
| Trp82      | <b>18</b> , hydrophobic- $\pi$ -alkyl                              |
| Trp82      | <b>18</b> , hydrophobic- $\pi$ -alkyl                              |
| Leu286     | <b>18</b> , hydrophobic- $\pi$ -alkyl                              |
| His438     | <b>18</b> , hydrophobic- $\pi$ -alkyl                              |

Interactions between compound **19** and BChE.

| Amino acid | Non-bonding interactions                        |
|------------|-------------------------------------------------|
| Ser287     | H61, hydrogen bond-conventional hydrogen bond   |
| Pro285     | H65, hydrogen bond-carbon hydrogen bond         |
| Thr284     | H66, hydrogen bond-carbon hydrogen bond         |
| Ser287     | H66, hydrogen bond-carbon hydrogen bond         |
| Ser287     | H66, hydrogen bond-carbon hydrogen bond         |
| Trp82      | <b>19</b> , hydrophobic- $\pi$ - $\pi$ T-shaped |
| Trp82      | <b>19</b> , hydrophobic- $\pi$ - $\pi$ T-shaped |
| Phe329     | <b>19</b> , hydrophobic- $\pi$ - $\pi$ T-shaped |
| His438     | <b>19</b> , hydrophobic- $\pi$ - $\pi$ T-shaped |
| His438     | <b>19</b> , hydrophobic- $\pi$ - $\pi$ T-shaped |
| Trp82      | Cl22, hydrophobic- $\pi$ -alkyl                 |
| Trp82      | Cl22, hydrophobic- $\pi$ -alkyl                 |
| Leu286     | <b>19</b> , hydrophobic- $\pi$ -alkyl           |

Interactions between compound **20** and BChE.

| Amino acid | Non-bonding interactions                      |
|------------|-----------------------------------------------|
| Ser287     | H29, hydrogen bond-conventional hydrogen bond |
| Asp70      | H40, hydrogen bond-carbon hydrogen bond       |
| Val288     | Cl28, hydrophobic-alkyl                       |
| Trp82      | <b>20</b> , hydrophobic- $\pi$ -alkyl         |
| Trp82      | C26, hydrophobic- $\pi$ -alkyl                |
| Trp82      | <b>20</b> , hydrophobic- $\pi$ -alkyl         |
| Trp82      | C26, hydrophobic- $\pi$ -alkyl                |
| Trp231     | Cl28, hydrophobic- $\pi$ -alkyl               |
| Trp231     | Cl28, hydrophobic- $\pi$ -alkyl               |
| His438     | <b>20</b> , hydrophobic- $\pi$ -alkyl         |

Interactions between compound **21** and BChE.

| Amino acid | Non-bonding interactions                |
|------------|-----------------------------------------|
| Asp70      | N17, electrostatic-attractive charge    |
| Asp70      | H49, hydrogen bond-carbon hydrogen bond |
| Gln119     | H51, hydrogen bond-carbon hydrogen bond |
| Gly116     | H52, hydrogen bond-carbon hydrogen bond |
| Pro285     | H58, hydrogen bond-carbon hydrogen bond |
| HOH930     | <b>21</b> , other- $\pi$ -lone pair     |
| Trp82      | <b>21</b> , hydrophobic- $\pi$ -alkyl   |
| Trp82      | C7, hydrophobic- $\pi$ -alkyl           |
| Trp82      | <b>21</b> , hydrophobic- $\pi$ -alkyl   |
| Trp82      | <b>21</b> , hydrophobic- $\pi$ -alkyl   |
| Trp82      | C7, hydrophobic- $\pi$ -alkyl           |
| Trp82      | <b>21</b> , hydrophobic- $\pi$ -alkyl   |
| His438     | <b>21</b> , hydrophobic- $\pi$ -alkyl   |

Interactions between compound **22** and AChE.

| Amino acid | Non-bonding interactions                        |
|------------|-------------------------------------------------|
| Thr284     | H80, hydrogen bond-conventional hydrogen bond   |
| Ser287     | H65, hydrogen bond-carbon hydrogen bond         |
| Ser287     | H67, hydrogen bond-carbon hydrogen bond         |
| Pro285     | H69, hydrogen bond-carbon hydrogen bond         |
| Pro285     | H72, hydrogen bond-carbon hydrogen bond         |
| Pro285     | H73, hydrogen bond-carbon hydrogen bond         |
| Ser287     | H74, hydrogen bond-carbon hydrogen bond         |
| Trp82      | N17, electrostatic- $\pi$ -cation               |
| Trp82      | H53, hydrophobic- $\pi$ -sigma                  |
| Trp82      | <b>22</b> , hydrophobic- $\pi$ - $\pi$ T-shaped |
| Trp82      | <b>22</b> , hydrophobic- $\pi$ - $\pi$ T-shaped |
| Trp82      | <b>22</b> , hydrophobic- $\pi$ - $\pi$ T-shaped |
| Pro285     | C7, hydrophobic-alkyl                           |
| Ile442     | Cl22, hydrophobic-alkyl                         |
| Trp82      | Cl22, hydrophobic- $\pi$ -alkyl                 |
| Trp82      | Cl22, hydrophobic- $\pi$ -alkyl                 |

Interactions between compound **23** and BChE.

| Amino acid | Non-bonding interactions             |
|------------|--------------------------------------|
| Asp70      | N35, electrostatic-attractive charge |

|               |                                                                    |
|---------------|--------------------------------------------------------------------|
| HOH930        | H78, hydrogen bond-water hydrogen bond; carbon hydrogen bond       |
| HOH930        | H79, hydrogen bond-water hydrogen bond; carbon hydrogen bond       |
| HOH989        | H80, hydrogen bond-water hydrogen bond; conventional hydrogen bond |
| HOH806        | H81, hydrogen bond-water hydrogen bond; conventional hydrogen bond |
| Asp70         | H81, hydrogen bond-conventional hydrogen bond                      |
| Ser198        | H60, hydrogen bond-carbon hydrogen bond                            |
| Asp70         | H78, hydrogen bond-carbon hydrogen bond                            |
| Trp231        | N17, electrostatic- $\pi$ -cation                                  |
| Phe329        | <b>23</b> , hydrophobic- $\pi$ - $\pi$ T-shaped                    |
| Phe329        | <b>23</b> , hydrophobic- $\pi$ - $\pi$ T-shaped                    |
| Gly116;Gly117 | <b>23</b> , hydrophobic-amide- $\pi$ stacked                       |
| Gly116;Gly117 | <b>23</b> , hydrophobic-amide- $\pi$ stacked                       |
| Ala277        | <b>23</b> , hydrophobic-alkyl                                      |
| Trp82         | <b>23</b> , hydrophobic- $\pi$ -alkyl                              |

## Prediction of drug-likeness and blood-brain barrier (BBB) penetration

**Table S1.** *In silico* determined physicochemical characteristics of the tested aminoquinolines important for compounds to be orally active in humans and their *in silico* determined ability to pass the brain-blood barrier by passive transport.

| Compound | M <sub>w</sub> | logP | HBD | HBA | RB | PSA   | Lipinski's rule | logBB | ADMET_BBB_level |
|----------|----------------|------|-----|-----|----|-------|-----------------|-------|-----------------|
| 1        | 369.94         | 4.27 | 2   | 3   | 6  | 36.95 | √               | 0.496 | 1               |
| 2        | 383.96         | 4.33 | 2   | 3   | 7  | 36.95 | √               | 0.423 | 1               |
| 3        | 397.99         | 4.85 | 2   | 3   | 8  | 36.95 | √               | 0.603 | 1               |
| 4        | 426.05         | 5.74 | 2   | 3   | 10 | 36.95 | − / √           | 0.885 | 0               |
| 5        | 454.10         | 6.63 | 2   | 3   | 12 | 36.95 | −               | 1.167 | 0               |
| 6        | 403.49         | 4.54 | 2   | 3   | 7  | 36.95 | √               | 0.490 | 1               |
| 7        | 417.52         | 4.60 | 2   | 3   | 8  | 36.95 | √               | 0.509 | 1               |
| 8        | 383.96         | 4.55 | 2   | 3   | 7  | 36.95 | √               | 0.609 | 1               |
| 9        | 546.24         | 7.64 | 1   | 3   | 10 | 28.16 | −               | 1.487 | 0               |
| 10       | 574.2          | 8.23 | 1   | 3   | 12 | 28.16 | −               | -     | 4               |
| 11       | 588.32         | 8.68 | 1   | 3   | 13 | 28.16 | −               | -     | 4               |
| 12       | 397.99         | 4.75 | 2   | 3   | 7  | 36.95 | √               | 0.632 | 1               |
| 13       | 431.55         | 5.02 | 2   | 3   | 8  | 36.95 | √               | 0.626 | 1               |
| 14       | 410.02         | 5.03 | 2   | 3   | 8  | 36.95 | √               | 0.731 | 0               |
| 14       | 363.55         | 4.14 | 2   | 3   | 7  | 36.95 | √               | 0.434 | 1               |
| 16       | 391.60         | 4.95 | 2   | 3   | 9  | 36.95 |                 | 0.791 | 0               |
| 17       | 417.98         | 6.07 | 2   | 3   | 5  | 36.95 | − / √           | 1.184 | 0               |
| 18       | 417.98         | 6.07 | 2   | 3   | 5  | 36.95 | − / √           | 1.184 | 0               |
| 19       | 482.07         | 7.35 | 2   | 3   | 6  | 36.95 | − / √           | -     | 4               |
| 20       | 395.98         | 5.12 | 0   | 3   | 3  | 19.37 | √               | 1.100 | 0               |
| 21       | 410.00         | 5.41 | 0   | 3   | 4  | 19.37 | √               | 1.199 | 0               |
| 22       | 510.17         | 4.53 | 2   | 5   | 11 | 43.43 | −               | 0.366 | 1               |
| 23       | 524.19         | 4.54 | 2   | 5   | 12 | 43.43 | −               | 0.466 | 1               |
| Tacrine  | 234.73         | 2.63 | 1   | 2   | 0  | 38.91 | √               | 0.018 | 1               |

## ***In vitro* determined antioxidative potential of 4-aminoquinolines**

**Table S2.** The FRAP values of 10  $\mu\text{M}$  and 100  $\mu\text{M}$  4-aminoquinolines. Determined FRAP values are shown as mean values  $\pm$  standard error of three independent experiments.

| Compound | FRAP ( $\mu\text{M}$ ) |                   |
|----------|------------------------|-------------------|
|          | 10 $\mu\text{M}$       | 100 $\mu\text{M}$ |
| 1        | $2.4 \pm 1.3$          | $20 \pm 4$        |
| 2        | $19 \pm 2$             | $64 \pm 5$        |
| 3        | 0                      | $38 \pm 6$        |
| 4        | $1.9 \pm 0.5$          | $58 \pm 10$       |
| 5        | $9.5 \pm 1.9$          | $82 \pm 4$        |
| 6        | $4.6 \pm 0.8$          | $25 \pm 6$        |
| 7        | $7.1 \pm 2.1$          | $21 \pm 7$        |
| 8        | $33 \pm 12$            | $62 \pm 7$        |
| 9        | $3.4 \pm 0.0$          | $29 \pm 6$        |
| 10       | $13 \pm 4$             | $90 \pm 6$        |
| 11       | $5.3 \pm 1.4$          | $23 \pm 4$        |
| 12       | $24.2 \pm 0.0$         | $37 \pm 7$        |
| 13       | $19 \pm 7$             | $64 \pm 5$        |
| 14       | $7.6 \pm 2.3$          | $86 \pm 8$        |
| 15       | $9.3 \pm 2.2$          | $224 \pm 21$      |
| 16       | $4.1 \pm 0.4$          | $46 \pm 4$        |
| 17       | $53 \pm 4$             | $512 \pm 117$     |
| 18       | $22 \pm 6$             | $300 \pm 32$      |
| 19       | $336 \pm 12$           | $2450 \pm 210$    |
| 20       | $2.9 \pm 1.1$          | $6.3 \pm 1.6$     |
| 21       | $6.0 \pm 2.0$          | $15 \pm 5$        |
| 22       | $11 \pm 3$             | $34 \pm 8$        |
| 23       | $1.4 \pm 0.1$          | $20 \pm 5$        |
| tacrine  | $3.4 \pm 0.0$          | $15 \pm 2$        |
| BHT      | $4800 \pm 33$          | $3021 \pm 117$    |
| Trolox   | $523 \pm 8$            | $5812 \pm 68$     |

## Chromatographic determination of lipophilicity

Lipophilicity of synthesized compounds was evaluated under reversed-phase thin-layer chromatographic condition using the vertical developing chamber (CAMAG, Muttens, Switzerland) on 10 × 10 cm aluminium plates covered with octadecyl modified silica RP-18W F254s (Art. 5559, Merck, Darmstadt, Germany). The mobile phase contained organic modifier (methanol, acetone or dioxane), water and hydrochloric acid. The content of hydrochloric acid was kept constant at 5 %v/v while the portion of the organic modifier and water were changed. Methanol was varied in the range from 50-90 %v/v (for compounds **9**, **8**, **11** and **10** in range 70-90 %v/v) with an increment of 5%, acetone was varied in range 40-70 %v/v (compounds **9**, **8**, **11** and **10** in range 60-80 %v/v) with an increment of 5%, and dioxane in range 40-90 %v/v, (compounds **9**, **8**, **11** and **10** in range 50-90%), with an increment of 10%. The chamber was saturated with a mobile phase being used 15 minutes before chromatogram development. The solvent developing distance was 4.5 cm. Detection of individual zones was performed under UV light (254 and 360 nm). All experiments were performed at ambient temperature (22±2 °C). Retention parameters were calculated as previously described [7]. The log*D* values of the investigated substances were determined by the interpolation procedure. Standard substances with known log*P* and p*K*<sub>a</sub> values were chromatographed simultaneously with investigated compounds on RP-18W F254s stationary phase with mobile phase methanol/water/hydrochloric acid 70/25/5 %v/v, pH = 0.5.

Equations (S1) and (S2) for monoacidic and diacidic base, respectively, were used to obtain log*D* values of the standard compounds at pH = 0.5:

$$\log D = \log P - \log(1 + 10^{(pK_a - pH)}) \quad (S1)$$

$$\log D = \log P - \log(1 + 10^{(pK_{a1} - pH)} + 10^{(pK_{a1} + pK_{a2} - 2pH)}) \quad (S2)$$

where log*P* values correspond to the neutral form of the weak base. For diacidic bases p*K*<sub>a1</sub> > p*K*<sub>a2</sub>. Log*D* values of the investigated substances were determined from the equation of the calibration curve obtained by plotting their *R*<sub>M</sub> values against log*D* values of standard substances [79].

## Multivariate statistical analysis and modelling

Multivariate statistical analysis and modelling were performed by a PLS Toolbox software package (v. 5.7 Eigenvectors Inc. Manson, WA USA) for MATLAB (v. 7.8.0 R2009) (MathWorks, Natick, MA, USA).

To obtain a data overview, principal component analysis (PCA) was performed on both chromatographic data and calculated structural descriptors by using a singular value decomposition

algorithm (SVD) and a 0.95 confidence level for Q and T<sup>2</sup> Hotelling limits for outliers. Before the PCA, autoscaling was performed [7].

Partial least square regression was performed by the SIMPLS algorithm without forcing orthogonality constraints to the model which is supposed to condense Y-block variance into the first few latent variables. The quality of the regression fits is given by  $R^2_{cal}$ ,  $R^2_{CV}$ ,  $R^2_{pred}$ ,  $RMSEC$ ,  $RMSECV$ , and  $RMSEP$  [7]. The entire set of 191 molecular descriptors was used in modelling dependent variables, lipophilicity and biological activity. The number of variables in the final models was reduced after double PLS regression by removing variables with VIP scores lower than 1 which were considered as insignificant. The final PLS models were done by leaving one out cross-validation procedure. The prediction power of the obtained QSRR and QSAR models were tested on a set of randomly selected compounds (**2**, **5**, **9**, **13**, **17** and **21**).

### Principal Component Analysis

The PCA performed on chromatographic data resulted in a two-component model that explains 97.25% of the total variance. The first principal component (PC1) accounted for 94.73% of data variance, and the second 2.52%. All compounds are inside of the Hotelling T<sup>2</sup> ellipse (**Figure S1A**). Generally, the order of the compounds along the PC1 axis follows the trend of increasing their lipophilicity values. In the upper left part of the score graph compounds **1-5**, **12**, **14**, and **15** which all have chlorine on C(7), were grouped. Compounds **1 – 5** form one small series of compounds with an increasing number of methylene groups in the spacer and methyleneadamantane moiety on terminal nitrogen. Compounds **12** and **14** have a branched spacer and compound **23** has the longest spacer between the C(4)-amino group on aminoquinoline and piperazine and the spacer between piperazine and adamantane. More lipophilic compounds **6** and **7** with trifluoromethyl substituent on C(7) position instead of chlorine, **6** and **7**, with unbranched spacer, so as compound **13** with branched spacer is positioned in the lower left part of the score graph. Close to them are compounds **8** (with ethyleneadamantane group on terminal nitrogen), **15**, **16** (with branched spacer and without substituents on C(7) position), compounds **17** and **18** (with benzene ring in the spacer), so as to compound **21** (with piperazine in the spacer and with the short chain). Compounds **20** and **22** with piperazine and longer spacer are isolated in the upper left part of the score graph, while compound **19** with naphthalene ring is singled out in the lower right part of the score graph. The addition of second ethyleneadamantane moiety drastically reduced the lipophilicity of the compounds **9**, **10**, and **11** which are located on the extreme right part of the score graph with positive values of PC1. The graph of loadings (**Figure S1B**) indicate that chromatographic systems are ordered along PC2 axis. Mobile phases containing methanol have positive values of PC2, while mobile phases containing acetone and dioxane have negative values of PC2. PCA performed on reduced number of

calculated structural descriptors resulted in a four-component model that explains 95.25% of the total variance. The PC1 accounted for 42.69%, the PC2 for 24.54%, the PC3 for 8.27%, and the PC4 for 7.04% of data variance.

The score plot of the first two principal components obtained after PCA performed on the calculated structural descriptors (**Figure S1A**) revealed a similar arrangement of compounds as the graph of scores on retention data. Compound **22** lay outside the Hotelling  $T^2$  ellipse, next to the border, while the compound **23** is on the very boundary of the ellipse. These compounds have the highest positive values of PC2. Opposite to them are compounds **17**, **18** and **19** with aromatic structures in the spacer with the highest negative values of PC2. The group with the highest positive PC1 values consists of compounds **9**, **10**, and **11** with two ethylenedamantane groups in their structure. Other compounds form a group which have a negative value of PC1 (except compound **5**) and PC2 values around zero. The graph of loadings (**Figure S1B**) indicates that the grouping of compounds around zero PC2 is influenced mainly by the descriptors which encode dipole and polar characteristics of compounds. Physicochemical descriptors which encode nonpolar characteristics of investigated compounds, together with experimentally determined  $\log D$ , and topological descriptors are in the upper right part of the graph, influencing the position of most lipophilic compounds **9**, **10**, and **11**. Quantum-chemical descriptors HOMO, LUMO, PISA, and physico-chemical descriptors which encode permeability processes (QPPMDCK, QPPCaco, QPlogKp) are discriminative for grouping compounds with aromatic structures in the spacer (**17**, **18**, **19**). On the other hand, physicochemical descriptors which encode polar characteristics of compounds (accptHB, SP), so as quantum-chemical descriptor IP(eV) are discriminative for the position of compounds **22** and **23** with the piperazine in the spacer.

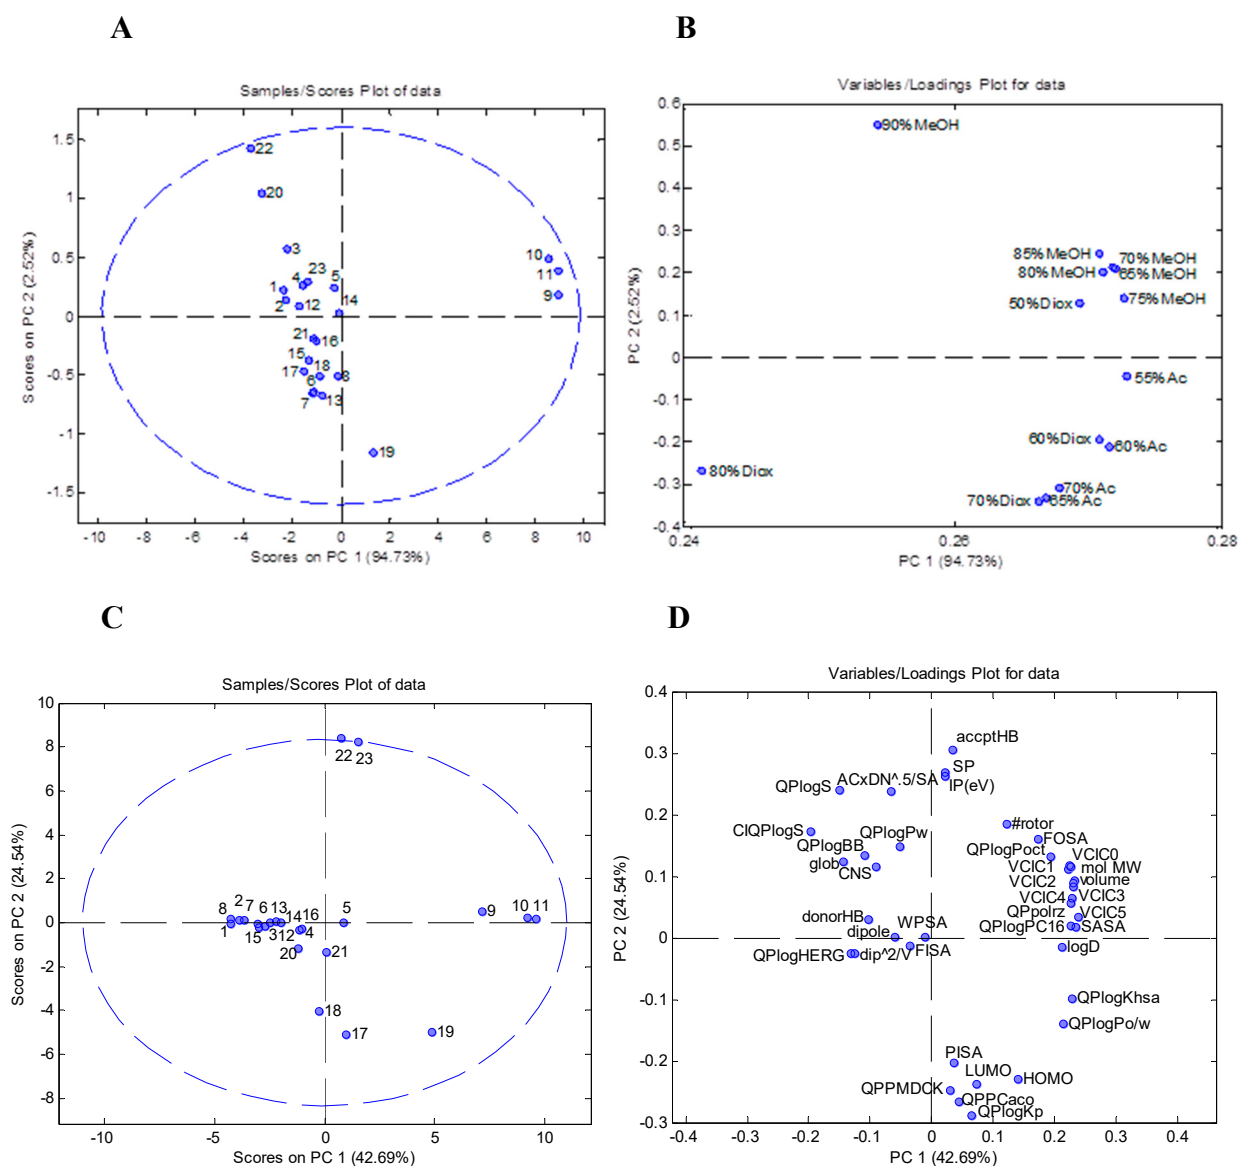

**Figure S1.** PC1–PC2 score plots of retention parameters and descriptors (A and C respectively) and factor loadings (B and D respectively).

## Quantitative Structure-Property Relationship (QSPR)

Lipophilicity is one of the most important parameters in Quantitative Structure-Property /Activity Relationships (QSPR/ QSAR) which influences passive diffusion of drugs through biological membranes allowing the drug to reach the site of action. It affects pharmacodynamics, pharmacokinetics, and toxicological aspects of a drug candidate.

The thin-layer chromatography (TLC) method as a quick, simple and efficient method, has become one of the most commonly used procedures in the determination of lipophilicity. Relative lipophilicity parameters, determined by TLC method ( $R_M^0$ ), are widely applied in QSPR analysis which correlates retention data  $R_M$  or  $R_M^0$  and different structural descriptors of compounds [8].

The series of investigated compounds were chromatographed on RP-18 silica with mobile phase containing different portions of organic modifier (methanol, acetone or dioxane), water and hydrochloric acid. The highest selectivity provided methanol and acetone.

The dependence of the  $R_F$  values on the composition of the mobile phase are given in Tables S1-S3 (Supplementary material 3, SI3). The statistical details of retention and corresponding  $R_M^0$  are summarized in Tables S4-S6 (SI3).

Mobile phase MeOH/H<sub>2</sub>O/HCl, 70:25:5 (vol %), was used in the determination of the partition coefficients of the investigated compounds, logD<sub>exp</sub> at pH 0.5 (SI3 Table S7).

Increasing the number of methylene groups in the spacer led to the increase of  $R_M^0$  and logD<sub>exp</sub> values in a series of compounds **1** - **5**. Introduction of the voluminous and strong electron-withdrawing CF<sub>3</sub>-C(7) group on quinoline ring led to the increasing lipophilicity of compounds **6** and **7** in comparison to compounds **1** and **2**. Compounds **9**, **10**, and **11** are the most lipophilic due to the presence of two lipophilic ethyleneadamantane moiety, and their  $R_M^0$  and logD<sub>exp</sub> values increased in the order **9** < **10** < **11**. Derivatives with branched spacer, series **12** – **16** exhibited higher values of lipophilicity compared to the unbranched analogues. Also, within the series, H-C(7) analogues, **15**, and **16** have lower lipophilicity in comparison to their Cl-C(7) analogues **12** and **14**, respectively. The introduction of aromatic rings in the spacer between aminoquinoline and adamantane part resulted in increasing lipophilicity, while the introduction of piperazine moiety in compounds **20** – **23** have the opposite effect.

In QSPR study PLS regression was used to obtain information regarding the nature of the intermolecular forces involved in passing the investigated molecules through the cell membrane. Experimentally determined values of lipophilicity  $R_M^0$  and logD<sub>exp</sub> were correlated with calculated structural descriptors [9] obtained for studied compounds in their neutral form (SI3). The statistical performances of derived PLS models and the most contributing descriptors (VIP>1) are given in **Table S3** in decreasing order with the sign of their regression coefficients. All obtained models are with good predictive abilities and include similar descriptors which belong to several groups. Ring descriptors are used in the description of ring systems, topological descriptors encode different types of branching and the descriptors from the group of physico-chemical encode permeation abilities and solubility of compounds. The best obtained PLS model correlates logD<sub>exp</sub> values with ring fusion degree (RF), ring bridge count (RBC), topological charge indexes of order 9 and 3 (TCIO9, TCIO3), valence connectivity index chi-3 (VCIC3), in a positive manner, and predicted water/gas partition coefficient (QPlogPw), normalized number of ring systems (Nnrs), and eccentric (ECC) in a negative manner.

**Table S3.** The statistical performances of QSPR models connecting the most contributing molecular descriptors with molecular lipophilicity<sup>a</sup>

| Dependent variable / organic modifier            | Statistical performance of the model                                                                                                                                                                                          | Structural descriptors included in PLS model <sup>b</sup>                                                                                                                                                    |
|--------------------------------------------------|-------------------------------------------------------------------------------------------------------------------------------------------------------------------------------------------------------------------------------|--------------------------------------------------------------------------------------------------------------------------------------------------------------------------------------------------------------|
| <b><i>R<sub>M</sub><sup>0</sup>(MeOH)</i></b>    | RMSEC = 0.307, RMSECV = 0.388, RMSEP = 0.350<br>R <sup>2</sup> <sub>cal</sub> = 0.921, R <sup>2</sup> <sub>CV</sub> = 0.874, R <sup>2</sup> <sub>pred</sub> = 0.927<br>PLS1: = 52.08% and 88.50%<br>PLS2: = 33.82% and 3.58%  | TCIO9 (+), QPlogPo/w (+), QplogPw (+), #stars (+), CIQPlogS (-), TCIO3 (+), VCIC5 (+), VCIC4 (+), Q (+), CIX4 (+), SCIX4 (+), CIX5 (+), RDSRI (+), VCIC3 (+), C (+), VCIC2 (+), 2Z (+), H (+), QPlogHERG (+) |
| <b><i>R<sub>M</sub><sup>0</sup>(Acetone)</i></b> | RMSEC = 0.209, RMSECV = 0.306, RMSEP = 0.265<br>R <sup>2</sup> <sub>cal</sub> = 0.890, R <sup>2</sup> <sub>CV</sub> = 0.768, R <sup>2</sup> <sub>pred</sub> = 0.856<br>PLS1: = 46.24% and 84.78%<br>PLS2: = 26.54% and 4.20%  | RBC (+), VCIC5 (+), VCIC4 (+), QPlogKhsa (+), VCIC3 (+), VCIC2 (+), C (+), QPlogPo/w (+), IP(eV) (+), VCIC1 (+), CIQPlogS (-)                                                                                |
| <b><i>R<sub>M</sub><sup>0</sup>(Dioxane)</i></b> | RMSEC = 0.137, RMSECV = 0.173, RMSEP = 0.175<br>R <sup>2</sup> <sub>cal</sub> = 0.899, R <sup>2</sup> <sub>CV</sub> = 0.841, R <sup>2</sup> <sub>pred</sub> = 0.968<br>PLS1: = 75.17% and 69.45%<br>PLS2: = 12.89% and 20.48% | RF (+), Nnrs (-), PE -S-OPLS (-), QPlogBB (-), CIQPlogS (-), LUMO (+), HOMO (+), #stars (+), QPlogPo/w (+), RBC (+), TCIO9 (+), TF-S-OPLS (-)                                                                |
| <b><i>logD<sub>exp</sub></i></b>                 | RMSEC = 0.968, RMSECV = 1.231, RMSEP = 0.927<br>R <sup>2</sup> <sub>cal</sub> = 0.968, R <sup>2</sup> <sub>CV</sub> = 0.942, R <sup>2</sup> <sub>pred</sub> = 0.981<br>PLS1: = 82.02% and 82.35%<br>PLS2: = 10.46% and 14.44% | RF (+), QPlogPw (-), RBC (+), Nnrs (-), TCIO9 (+), VCIC5 (+), QPlogKhsa (+), ECC (-), VCIC4 (+), TCIO3 (+), QPlogPo/w (+), QPlogKhsa (+)                                                                     |

<sup>a</sup>The details of the obtained PLS models and corresponding graphics that illustrate the contribution of a structural descriptor to molecular lipophilicity are provided in Graphics S1-S4.

<sup>b</sup>For abbreviation definitions and a complete list of molecular descriptors see SI3.

## References

1. Koska, J., Spassov, V.Z., Maynard, A.J., Yan, L., Austin, N., Flook, P.K., Venkatachalam, C.M. Fully automated molecular mechanics based induced fit protein–ligand docking method. *J Chem Inf Model* **2008**, 48(10), 1965–1973.
2. Cheung, J., Rudolph, M.J., Burshteyn, F., Cassidy, M.S., Gary, E.N., Love, J., Franklin, M.C., Height, J.J. Structures of human acetylcholinesterase in complex with pharmacologically important ligands, *J Med Chem* **2012**, 55, 10282–10286.
3. Nicolet, Y., Lockridge, O., Masson, P., Fontecilla-Camps, J.C., Nachon, F. Crystal structure of human butyrylcholinesterase and of its complexes with substrate and products, *J Biol Chem* **2003**, 278, 41141–41147.
4. Xu, Y., Colletier, J-P., Weik, M., Jiang, H., Moulton, J., Silman, I., Sussman, J.L. Flexibility of aromatic residues in the active-site gorge of acetylcholinesterase: x-ray versus molecular dynamics. *Biophys J* **2008**, 95, 2500–2511.
5. Šinko, G. Assessment of scoring functions and in silico parameters for AChE–ligand interactions as a tool for predicting inhibition potency. *Chem Bio Interact* **2019**, 308, 216–223.
6. Rosenberry, T., Brazzolotto, X., Macdonald, I., Wandhammer, M., Trovaslet-Leroy, M., Darvesh, S., Nachon, F. Comparison of the binding of reversible inhibitors to human butyrylcholinesterase and acetylcholinesterase: a crystallographic, kinetic and calorimetric study. *Molecules* **2017**, 22(12), 2098.
7. Aleksic, I., Jeremic, J., Milivojevic, D., Ilic-Tomic, T., Šegan, S., Zlatović, M., Opsenica, D. M., Senerovic, L. N-benzyl derivatives of long-chained 4-amino-7-chloro-quinolines as inhibitors of pyocyanin production in *Pseudomonas aeruginosa*. *ACS Chem Biol* **2019**, 14(12), 2800–2809.
8. Dąbrowska, M., Starek, M., Chłom-Rzepa, G., Zagorska, A., Komsta, Ł., Jankowska, A., Ślusarczyk, M., Pawłowski, M. Estimation of the lipophilicity of purine-2,6-dione-based TRPA1 antagonists and PDE4/7 inhibitors with analgesic activity. *Bioorg Med Chem Lett* **2021**, 49, 128318.
9. Todeschini, R., Consonni, V. Handbook of molecular descriptors, methods and principles in medicinal chemistry, 11th ed.; Mannhold, R., Kubinyi, H. Timmerman, H. Wiley-vch, Weinheim, Germany, **2000**.
