# Supplementary material for: 4-Aminoquinoline-Based Adamantanes as Potential Anticholinesterase Agents in Symptomatic Treatment of Alzheimer’s Disease
Source: Pharmaceutics. 2022 Jun 20;14(6):1305. doi: 10.3390/pharmaceutics14061305 (PMC9229919; doi:10.3390/pharmaceutics14061305)
Supplement: Supplementary file 1 [file pharmaceutics-14-01305-s001.zip › Supplementary Materials File S3 v06_Final_Proof 2_Opsenica.xls]

## Sheet: Table of contents
Supplementary material 2
	4-aminoquinolines-based adamantanes as potential anticholinesterase agents in symptomatic treatment of Alzheimer’s disease
Katarina Komatović1, Ana Matošević2, Suzana Žunec2, Nataša Terzić-Jovanović3, Sandra Šegan3, Mario Zlatović1, Nikola Maraković2, Anita Bosak*2, Dejan Opsenica*3,4
1 University of Belgrade - Faculty of Chemistry, Studentski trg 12 -16, 11158 Belgrade, Serbia,
2 Institute for Medical Research and Occupational Health, Ksaverska cesta 2, Zagreb, Croatia,
3 University Of Belgrade – Institute of Chemistry, Technology and Metallurgy (IHTM), Njegoševa 12, 11000 Belgrade, Serbia,
4 Centre of Excellence in Environmental Chemistry and Engineering, ICTM, 11000 Belgrade, Serbia
Table of contents
List of molecular descriptors
Table S1	RF values of investigated compounds in chromatpgraphic system Methanol/Water/Hydrochloric acid (conc.)
Table S2	RF values of investigated compounds in chromatpgraphic system Acetone/Water/Hydrochloric acid (conc.)
Table S3	RF values of investigated compounds in chromatpgraphic system Dioxane/Water/Hydrochloric acid (conc.)
Table S5	Regression coefficients for chromatographic system Acetone/Water/Hydrochloric acid (conc.)
Table S6	Regression coefficients for chromatographic system Dioxane/Water/Hydrochloric acid (conc.)
Table S7	logD (pH 0.5) values of the investigated substances determined by interpolation method
Compunds molecular descriptors data matrix
Details of PLS model (logD)
	Graphic S1: Plot of the regression coefficients of descriptors of PLS model for for logD values obtained by interpolation method.
Details of PLS model (RM0 MeOH)
	Graphic S2: Plot of the regression coefficients of descriptors of PLS model for for RM0 values obtained in chromatographic system with methanol in mobile phase.
Details of PLS model (RM0 Ac)
	Graphic S3: Plot of the regression coefficients of descriptors of PLS model for RM0 values obtained in chromatographic system with acetone in mobile phase. Variables with VIP score >1 are marked in blue.
Details of PLS model (RM0 Diox)
	Graphic S4: Plot of the regression coefficients of descriptors of PLS model for for RM0 values obtained in chromatographic system with dioxane in mobile phase.
Details of PLS model (AChE)
	Graphic S5: Plot of the regression coefficients of descriptors of PLS model for for log(Ki/µM), AChE.
Details of PLS model (BChE)
	Graphic S6: Plot of the regression coefficients of descriptors of PLS model for for log(Ki/µM), BChE.

## Sheet: List of molecular descriptors
List of molecular descriptors
No.	Descriptor designation	Description/explanation/full name	Descriptor type
1	IP(eV)	Ionization Penalty	Electrostatic
2	SP	State Penalty	Electrostatic
3	Tot Q	Tot Q	Electrostatic
4	PE -S-OPLS	Potential Energy-S-OPLS	Electrostatic
5	TF-S-OPLS	Times Found-S-OPLS	Quantum-chemical
6	#stars	Number of property or descriptor values that fall outside the 95% range of similar values for known drugs.	Constitutional
7	#amine	Number of non-conjugated amine groups.	Constitutional
8	#rotor	Number of non-trivial (not CX3), non-hindered (not alkene, amide, small ring) rotatable bonds.	Constitutional
9	CNS	Predicted central nervous system activity on a –2 (inactive) to +2 (active) scale.	Constitutional
10	mol MW	Molecular weight of the molecule	Constitutional
11	dipole	Mulican molecular dipole	Quantum-chemical
12	SASA	Total solvent accessible surface area (SASA) in square angstroms using a probe with a 1.4 Å radius	Geometrical
13	FOSA	Hydrophobic component of the SASA (saturated carbon and attached hydrogen)	Geometrical
14	FISA	Hydrophilic component of the SASA (SASA on N, O, H on heteroatoms, and carbonyl C)	Geometrical
15	PISA	π (carbon and attached hydrogen) component of the SASA	Geometrical
16	WPSA	Weakly polar component of the SASA (halogens, P, and S)	Geometrical
17	volume	Total solvent-accessible volume in cubic angstroms using a probe with a 1.4 Å radius	Geometrical
18	donorHB	Estimated number of hydrogen bonds that would be donated by the solute to water molecules in an aqueous solution	Constitutional
19	accptHB	Estimated number of hydrogen bonds that would be accepted by the solute from water molecules in an aqueous solution.	Constitutional
20	dip^2/V	Square of the dipole moment divided by the molecular volume.	Quantum-chemical
21	ACxDN^.5/SA	Index of cohesive interaction in solids	Constitutional
22	glob	Globularity descriptor. Globularity is 1.0 for a spherical molecule	Constitutional
23	QPpolrz	Predicted polarizability in cubic angstroms	Physico-chemical property
24	QPlogPC16	Predicted hexadecane/gas partition coefficient	Physico-chemical property
25	QPlogPoct	Predicted octanol/gas partition coefficient	Physico-chemical property
26	QPlogPw	Predicted water/gas partition coefficient	Physico-chemical property
27	QPlogPo/w	Predicted octanol/water partition coefficient	Physico-chemical property
28	QPlogS	Predicted aqueous solubility, log S	Physico-chemical property
29	CIQPlogS	Conformation-independent predicted aqueous solubility, log S	Physico-chemical property
30	QPlogHERG	Predicted IC50 value for blockage of HERG K+ channels	Physico-chemical property
31	QPPCaco	Predicted apparent Caco-2 cell permeability in nm/sec	Physico-chemical property
32	QPlogBB	Predicted brain/blood partition coefficient	Physico-chemical property
33	QPPMDCK	Predicted apparent MDCK cell permeability in nm/sec	Physico-chemical property
34	QPlogKp	Predicted skin permeability, log Kp	Physico-chemical property
35	IP(eV)	Ionization potential	Quantno-mechanical
36	EA(eV)	PM3 calculated electron affinity (negative of LUMO energy)	Quantno-mechanical
37	#metab	Number of likely metabolic reactions	Constitutional
38	QPlogKhsa	Prediction of binding to human serum albumin	Physico-chemical property
39	HOA	Predicted qualitative human oral absorption: 1, 2, or 3 for low, medium, or high. The	Physico-chemical property
40	PHOA	Predicted human oral absorption on 0 to 100% scale.The prediction is based on a quantitative multiple linear regression model.	Physico-chemical property
41	SAfluorine	Solvent-accessible surface area of fluorine atoms.	Constitutional
42	PSA	Van der Waals surface area of polar nitrogen and oxygen atoms and carbonyl carbon atoms	Constitutional
43	#NandO	Number of nitrogen and oxygen atoms	Constitutional
44	RuleOfFive	Number of violations of Lipinski’s rule of five	Constitutional
45	RuleOfThree	Number of violations of Jorgensen’s rule of three.	Constitutional
46	#ringatoms	Number of atoms in rings	Constitutional
47	#in56	Number of atoms in 5- or 6-membered rings	Constitutional
48	#noncon	number of ring atoms not able to form conjugated aromatic systems (e.g. sp3 C).	Constitutional
49	#nonHatm	Number of heavy atoms (nonhydrogen atoms).	Constitutional
50	Jm	Predicted maximum transdermal transport rate, Kp × MW × S (μg cm–2 hr–1).	Physico-chemical property
51	NDDOHF	NDDO Heat of Formation	Quantum-chemical
52	HOMO	HOMO Energy	Quantum-chemical
53	LUMO	LUMO Energy	Quantum-chemical
54	1Z	First Zagreb	Topological
55	1ZIVVD	First Zagreb index by valence vertex degrees	Topological
56	2Z	Second Zagreb	Topological
57	2ZIVVD	Second Zagreb index by valence vertex degrees	Topological
58	P	Polarity	Topological
59	NSI	Narumi Simple Topological	Topological
60	NHT	Narumi Harmonic Topological	Topological
61	NGT	Narumi Geometric Topological	Topological
62	TSC	Total structure connectivity	Topological
63	WPSA	Wiener	Topological
64	MW	Mean Wiener	Topological
65	X	Xu index	Topological
66	Q	Quadratic	Topological
67	RC	Radial centric	Topological
68	MSDB	Mean Square Distance Balaban	Topological
69	S	Superpendentic	Topological
70	H	Harary	Topological
71	Log prs	Log of product of row sums	Topological
72	Pog	Pogliani index	Topological
73	SMT	Schultz Molecular Topological	Topological
74	SMTVVDI	Schultz Molecular Topological by valence vertex degrees index	Topological
75	MDDD	Mean Distance Degree Deviation	Topological
76	R	Ramification	Topological
77	GMT	Gutman Molecular Topological	Topological
78	GMTIVVD	Gutman MTI by valence vertex degrees	Topological
79	AVDD	Average vertex distance degree	Topological
80	U	Unipolarity	Topological
81	C	Centralization	Topological
82	V	Variation	Topological
83	MEV	Molecular electrotopological variation	Topological
84	MEPV	Maximal electrotopological positive variation	Topological
85	MENV	Maximal electrotopological negative variation	Topological
86	EC	Eccentric connectivity	Topological
87	E	Eccentricity	Geometrical
88	AE	Average eccentricity	Geometrical
89	ECC	Eccentric	Geometrical
90	VCIC0	Valence connectivity index chi-0	Topological
91	VCIC1	Valence connectivity index chi-1	Topological
92	VCIC2	Valence connectivity index chi-2	Topological
93	VCIC3	Valence connectivity index chi-3	Topological
94	VCIC4	Valence connectivity index chi-4	Topological
95	VCIC5	Valence connectivity index chi-5	Topological
96	AVCIC0	Average valence connectivity index chi-0	Topological
97	AVCIC1	Average valence connectivity index chi-1	Topological
98	AVCIC2	Average valence connectivity index chi-2	Topological
99	AVCIC3	Average valence connectivity index chi-3	Topological
100	AVCIC4	Average valence connectivity index chi-4	Topological
101	AVCIC5	Average valence connectivity index chi-5	Topological
102	QW	Quasi Wiener	Topological
103	1M	First Mohar	Topological
104	2M	Second Mohar	Topological
105	STN	Spanning tree number	Topological
106	KBLI	Kier benzene-likeliness index	Topological
107	TCIO1	Topological charge index of order 1	Topological
108	TCIO2	Topological charge index of order 2	Topological
109	TCIO3	Topological charge index of order 3	Topological
110	TCIO4	Topological charge index of order 4	Topological
111	TCIO5	Topological charge index of order 5	Topological
112	TCIO6	Topological charge index of order 6	Topological
113	TCIO7	Topological charge index of order 7	Topological
114	TCIO8	Topological charge index of order 8	Topological
115	TCIO9	Topological charge index of order 9	Topological
116	TCIO10	Topological charge index of order 10	Topological
117	MTCIO1	Mean topological charge index of order 1	Topological
118	MTCIO2	Mean topological charge index of order 2	Topological
119	MTCIO3	Mean topological charge index of order 3	Topological
120	MTCIO4	Mean topological charge index of order 4	Topological
121	MTCIO5	Mean topological charge index of order 5	Topological
122	MTCIO6	Mean topological charge index of order 6	Topological
123	MTCIO7	Mean topological charge index of order 7	Topological
124	MTCIO8	Mean topological charge index of order 8	Topological
125	MTCIO9	Mean topological charge index of order 9	Topological
126	MTCIO10	Mean topological charge index of order 10	Topological
127	GTC	Global topological charge	Constitutional
128	HDPI	Hyper-distance-path index	Topological
129	RHDPI	Reciprocal hyper-distance-path index	Topological
130	SRDS	Square reciprocal distance sum	Topological
131	MRC	Modified Randic connectivity	Topological
132	KHE	Kier Hall electronegativity	Topological
133	STDNN	Sum of topological distances between N..N	Constitutional
134	STDNF	Sum of topological distances between N..F	Constitutional
135	STDNCl	Sum of topological distances between N..Cl	Constitutional
136	WtZ	Wiener-type index from Z weighted distance matrix - Barysz matrix	Topological
137	Whete	Wiener-type index from electronegativity weighted distance matrix	Topological
138	Whetm	Wiener-type index from mass weighted distance matrix	Topological
139	Whetv	Wiener-type index from van der waals weighted distance matrix	Topological
140	Whetp	Wiener-type index from polarizability weighted distance matrix	Topological
141	JhetZ	Balaban-type index from Z weighted distance matrix - Barysz matrix	Topological
142	Jhete	Balaban-type index from electronegativity weighted distance matrix	Topological
143	Jhetm	Balaban-type index from mass weighted distance matrix	Topological
144	Jhetv	Balaban-type index from van der waals weighted distance matrix	Topological
145	Jhetp	Balaban-type index from polarizability weighted distance matrix	Topological
146	TD	Topological diameter	Topological
147	TR	Topological radius	Topological
148	P2D	Petitjean 2D shape	Topological
149	J	Balaban distance connectivity index	Topological
150	SCIX0	Solvation connectivity index chi-0	Topological
151	SCIX1	Solvation connectivity index chi-1	Topological
152	SCIX2	Solvation connectivity index chi-2	Topological
153	SCIX3	Solvation connectivity index chi-3	Topological
154	SCIX4	Solvation connectivity index chi-4	Topological
155	SCIX5	Solvation connectivity index chi-5	Topological
156	CIX0	Connectivity index chi-0	Topological
157	CIX1	Connectivity chi-1 [Randic connectivity]	Topological
158	CIX2	Connectivity index chi-2	Topological
159	CIX3	Connectivity index chi-3	Topological
160	CIX4	Connectivity index chi-4	Topological
161	CIX5	Connectivity index chi-5	Topological
162	ACIX0	Average connectivity index chi-0	Topological
163	ACIX1	Average connectivity index chi-1	Topological
164	ACIX2	Average connectivity index chi-2	Topological
165	ACIX3	Average connectivity index chi-3	Topological
166	ACIX4	Average connectivity index chi-4	Topological
167	ACIX5	Average connectivity index chi-5	Topological
168	RDRII	reciprocal distance Randic-type index	Topological
169	RDSRI	reciprocal distance square Randic-type index	Topological
170	1KMSI	1-path Kier alpha-modified shape index	Topological
171	2KMSI	2-path Kier alpha-modified shape index	Topological
172	3KMSI	3-path Kier alpha-modified shape index	Topological
173	KF	Kier flexibility	Topological
174	RSIpw2	path/walk 2 - Randic shape index	Topological
175	RSIpw3	path/walk 3 - Randic shape index	Topological
176	RSIpw4	path/walk 4 - Randic shape index	Topological
177	RSIpw5	path/walk 5 - Randic shape index	Topological
178	ETP	E-state topological parameter	Topological
179	RC6	Ring Count 6	Ring descriptor
180	AC	Atom Count	Ring descriptor
181	BC	Bond Count	Ring descriptor
182	ARS	Atoms in Ring System	Ring descriptor
183	BRS	Bonds in Ring System	Ring descriptor
184	Cnum	Cyclomatic number	Ring descriptor
185	Nnum	Number of ring systems	Ring descriptor
186	Nnrs	Normalized number of ring systems	Ring descriptor
187	RF	Ring Fusion degree	Ring descriptor
188	TRS	Total ring size	Ring descriptor
189	RP	Ring perimeter	Ring descriptor
190	RBC	Ring bridge count	Ring descriptor
191	MCD	Molecule cyclized degree	Ring descriptor
192	logD	Experimentaly obtained logD (pH 0.5)	Physico-chemical property
193	RFD	Ring Fusion density	Ring descriptor
194	RCI	Ring complexity index	Ring descriptor
195	vdWSa	Van der Waals surface area	Ring descriptor

## Sheet: Tables S1- S7
																							*RM = log(1/RF-1)
																							*RM = RM0 + bC, where C is the concentration of organic modifier in mobile phase
	Table S1	RF values of investigated compounds in chromatpgraphic system Methanol/Water/Hydrochloric acid (conc.)																		*Table S4	Regression coefficients for chromatographic system Methanol/Water/Hydrochloric acid (conc.)
	Compound			I	II	III	IV	V	VI	VII	VIII	IX								Compound			RM0	SE(RM0)	b	SE(b)	F	P	R^2	R	F	N
	1			0.72	0.68	0.54	0.55	0.48	0.43	0.28	0.22	0.15		I = 90%MeOH/5%H2O/5%HCl						1			2.08094	0.13609	2.81231	0.19119	0.984206	0.968662	0.0740476	1.60531e-06	216.369	9
	2			0.73	0.67	0.52	0.53	0.47	0.43	0.25	0.19	0.11		II = 85%MeOH/10%H2O/5%HCl						2			2.33973	0.190947	3.12336	0.268257	0.975141	0.950899	0.103895	7.78423e-06	135.563	9
	3			0.71	0.65	0.51	0.53	0.44	0.37	0.25	0.18	0.11		III = 80%MeOH/15%H2O/5%HCl						3			2.34815	0.137302	3.09223	0.192892	0.986653	0.973484	0.0747069	8.92798e-07	256.989	9
	4			0.72	0.66	0.47	0.49	0.4	0.31	0.2	0.13	0.06		IV = 75%MeOH/20%H2O/5%HCl						4			2.89917	0.188147	3.74207	0.264323	0.982982	0.966253	0.102372	2.08228e-06	200.425	9
	5			0.67	0.62	0.42	0.44	0.34	0.23	0.11	0.07	0.02		V = 70%MeOH/25%H2O/5%HCl						5			3.7376	0.306227	4.66337	0.430212	0.971481	0.943775	0.16662	1.25436e-05	117.499	9
	6			0.73	0.67	0.51	0.53	0.44	0.39	0.23	0.18	0.11		VI = 65%MeOH/30%H2O/5%HCl						6			2.42121	0.147421	3.20788	0.207109	0.985723	0.971649	0.080213	1.12919e-06	239.905	9
	7			0.73	0.67	0.51	0.51	0.44	0.36	0.23	0.15	0.09		VII = 60%MeOH/35%H2O/5%HCl						7			2.60598	0.17048	3.42707	0.239504	0.983332	0.966942	0.0927593	1.93668e-06	204.75	9
	8			0.69	0.63	0.45	0.47	0.39	0.28	0.18	0.13	0.08		VIII = 55%MeOH/40%H2O/5%HCl						8			2.71345	0.126882	3.44621	0.178253	0.990766	0.981616	0.0690372	2.46927e-07	373.774	9
	9			0.44	0.31	0.11	0.1	0.05	0.01	0	0	0		IX = 50%MeOH/45%H2O/5%HCl						9			5.44631	0.633367	5.90958	0.788634	0.974311	0.949283	0.124694	0.00492336	56.1516	5
	10			0.44	0.31	0.1	0.1	0.05	0.01	0	0	0								10			5.45556	0.752651	5.90958	0.93716	0.964286	0.929847	0.148178	0.00805853	39.7637	5
	11			0.43	0.31	0.09	0.09	0.05	0.01	0	0	0								11			5.50366	0.845927	5.94001	1.0533	0.955929	0.913801	0.166542	0.0110323	31.8031	5
	12			0.71	0.66	0.53	0.5	0.44	0.36	0.25	0.18	0.1								12			2.4121	0.146591	3.17357	0.205943	0.985579	0.971366	0.0797613	1.16924e-06	237.466	9
	13			0.72	0.66	0.5	0.49	0.42	0.34	0.22	0.14	0.09								13			2.62607	0.151875	3.41974	0.213366	0.986647	0.973473	0.0826362	8.94044e-07	256.884	9
	14			0.67	0.62	0.45	0.42	0.34	0.25	0.16	0.1	0.03								14			3.29315	0.268313	4.12412	0.376947	0.971984	0.944752	0.145991	1.1792e-05	119.702	9
	15			0.71	0.67	0.54	0.51	0.45	0.36	0.27	0.2	0.11								15			2.30975	0.137838	3.06224	0.193646	0.986291	0.97277	0.0749987	9.80033e-07	250.071	9
	16			0.7	0.64	0.51	0.5	0.42	0.31	0.21	0.15	0.09								16			2.5841	0.135196	3.34459	0.189935	0.9889	0.977924	0.0735614	4.69284e-07	310.082	9
	17			0.73	0.69	0.54	0.53	0.45	0.35	0.24	0.15	0.09								17			2.64295	0.162829	3.50366	0.228755	0.985406	0.971025	0.0885964	1.21893e-06	234.586	9
	18			0.71	0.68	0.5	0.49	0.41	0.34	0.22	0.13	0.09								18			2.66385	0.160327	3.46783	0.22524	0.985554	0.971316	0.0872349	1.1764e-06	237.042	9
	19			0.67	0.61	0.44	0.35	0.3	0.21	0.1	0.04	0								19			3.68522	0.282634	4.54002	0.385062	0.979094	0.958624	0.124774	2.24876e-05	139.013	8
	20			0.67	0.7	0.58	0.56	0.48	0.45	0.38	0.31	0.22								20			1.5449	0.117205	2.15759	0.164659	0.980218	0.960828	0.0637721	3.51615e-06	171.7	9
	21			0.68	0.65	0.51	0.51	0.45	0.36	0.27	0.18	0.12								21			2.21902	0.147825	2.90624	0.207677	0.982593	0.965489	0.0804329	2.25269e-06	195.833	9
	22			0.67	0.7	0.6	0.59	0.5	0.45	0.38	0.31	0.22								22			1.56032	0.124722	2.19931	0.175219	0.978498	0.957459	0.0678619	4.69966e-06	157.548	9
	23			0.64	0.66	0.54	0.53	0.44	0.37	0.25	0.18	0.12								23			2.21106	0.170152	2.89246	0.239043	0.97692	0.954372	0.0925808	6.01318e-06	146.414	9
	Table S2	RF values of investigated compounds in chromatpgraphic system Acetone/Water/Hydrochloric acid (conc.)																		*Table S5	Regression coefficients for chromatographic system Acetone/Water/Hydrochloric acid (conc.)
	Compound			I	II	III	IV	V	VI	VII	VIII	IX		I = 80%AC/15%H2O/5%HCl						Compound		RM0	SE(RM0)	b	SE(b)	F	P	R^2	R	F	N
	1			(-)	(-)	0.62	0.59	0.51	0.41	0.36	0.32	0.16		II = 75%AC/20%H2O/5%HCl						1		1.73822	0.186752	2.88315	0.334073	0.968035	0.937093	0.0883874	0.000344863	74.4821	7
	2			(-)	(-)	0.61	0.58	0.5	0.41	0.35	0.3	0.15		III = 70%AC/25%H2O/5%HCl						2		1.79509	0.185482	2.94852	0.3318	0.96977	0.940454	0.0877861	0.000300244	78.9689	7
	3			(-)	(-)	0.63	0.58	0.51	0.41	0.35	0.3	0.15		IV = 65%AC/30%H2O/5%HCl						3		1.83762	0.175732	3.03995	0.314359	0.974293	0.949246	0.0831717	0.00020072	93.5147	7
	4			(-)	(-)	0.6	0.55	0.45	0.37	0.33	0.26	0.11		V = 60%AC/35%H2O/5%HCl						4		2.03607	0.229213	3.25392	0.410029	0.962521	0.926446	0.108483	0.000511862	62.9776	7
	5			(-)	(-)	0.55	0.49	0.39	0.32	0.28	0.19	0.04		VI = 55%AC/40%H2O/5%HCl						5		2.70563	0.448299	4.17336	0.801942	0.918777	0.844151	0.212174	0.00345531	27.0824	7
	6			(-)	(-)	0.57	0.53	0.45	0.36	0.32	0.24	0.11		VII = 50%AC/45%H2O/5%HCl						6		2.0143	0.215511	3.16927	0.385518	0.964942	0.931112	0.101999	0.000433742	67.5817	7
	7			(-)	(-)	0.57	0.54	0.42	0.36	0.32	0.24	0.11		VIII = 45%AC/50%H2O/5%HCl						7		2.01227	0.216412	3.15633	0.38713	0.964388	0.930044	0.102425	0.000450926	66.474	7
	8			(-)	(-)	0.55	0.5	0.39	0.34	0.29	0.21	0.08		IX = 40%AC/55%H2O/5%HCl						8		2.22711	0.267091	3.42068	0.477786	0.954528	0.911123	0.12641	0.00082634	51.2576	7
	9			0.58	0.5	0.33	0.28	0.13	0.09	0	0	0								9		3.55898	0.380687	4.68337	0.541085	0.98056	0.961498	0.0855531	0.0032442	74.9178	5
	10			0.59	0.52	0.33	0.28	0.13	0.09	0	0	0								10		3.64721	0.397694	4.82445	0.565258	0.980023	0.960446	0.0893751	0.00337917	72.8454	5
	11			0.58	0.52	0.32	0.27	0.12	0.08	0	0	0								11		3.75869	0.438648	4.95536	0.623468	0.977069	0.954663	0.0985789	0.00415407	63.1718	5
	12			(-)	(-)	0.62	0.58	0.48	0.41	0.34	0.29	0.15								12		1.83508	0.162187	3.00656	0.290129	0.977503	0.955511	0.076761	0.000144055	107.389	7
	13			(-)	(-)	0.56	0.52	0.4	0.34	0.3	0.23	0.1								13		2.07333	0.220574	3.20562	0.394574	0.964148	0.929581	0.104395	0.000458514	66.0034	7
	14			(-)	(-)	0.53	0.5	0.38	0.33	0.25	0.21	0.08								14		2.23637	0.245274	3.39568	0.43876	0.960705	0.922954	0.116085	0.000575562	59.8964	7
	15			(-)	(-)	0.6	0.55	0.45	0.4	0.35	0.29	0.15								15		1.74235	0.175296	2.80141	0.313579	0.970075	0.941045	0.0829651	0.000292785	79.8106	7
	16			(-)	(-)	0.59	0.54	0.44	0.39	0.33	0.26	0.12								16		1.94006	0.210034	3.08623	0.37572	0.964888	0.931008	0.0994063	0.000435394	67.4726	7
	17			(-)	(-)	0.59	0.54	0.44	0.39	0.33	0.25	0.11								17		2.01771	0.230034	3.21038	0.411498	0.961295	0.924089	0.108872	0.000554363	60.8666	7
	18			(-)	(-)	0.55	0.5	0.4	0.36	0.3	0.21	0.1								18		2.07434	0.213365	3.19063	0.381678	0.966037	0.933227	0.100983	0.00040089	69.8808	7
	19			(-)	(-)	0.49	0.41	0.3	0.28	0.25	0.2	0.15								19		1.65712	0.0981794	2.28928	0.175629	0.985603	0.971413	0.046467	4.74006e-05	169.905	7
	20			(-)	(-)	0.69	0.65	0.58	0.51	0.42	0.35	0.28								20		1.43204	0.0480143	2.59195	0.0858906	0.997266	0.99454	0.0227245	7.49558e-07	910.67	7
	21			(-)	(-)	0.59	0.53	0.44	0.4	0.35	0.29	0.17								21		1.61131	0.137722	2.56163	0.246365	0.977648	0.955796	0.0651821	0.000141747	108.112	7
	22			(-)	(-)	0.71	0.68	0.61	0.51	0.43	0.36	0.28								22		1.4989	0.064481	2.76303	0.115347	0.995671	0.991361	0.030518	2.36228e-06	573.798	7
	23			(-)	(-)	0.62	0.58	0.48	0.42	0.35	0.31	0.15								23		1.78381	0.190973	2.93373	0.341622	0.967732	0.936506	0.0903848	0.000353038	73.7476	7
	Table S3	RF values of investigated compounds in chromatpgraphic system Dioxane/Water/Hydrochloric acid (conc.)																		*Table S6	Regression coefficients for chromatographic system Dioxane/Water/Hydrochloric acid (conc.)
	Compound			I	II	III	IV	V	VI					I = 90%Dioxane/5%H2O/5%HCl						Compound		RM0	SE(RM0)	b	SE(b)	F	P	R^2	R	F	N
	1			(-)	0.78	0.73	0.73	0.55	0.4					II = 80%Dioxane/15%H2O/5%HCl						1		0.812871	0.225932	1.79634	0.36651	0.942856	0.888978	0.1159	0.0162565	0.0162565	5
	2			(-)	0.78	0.73	0.73	0.55	0.4					III = 70%Dioxane/25%H2O/5%HCl						2		0.812871	0.225932	1.79634	0.36651	0.942856	0.888978	0.1159	0.0162565	0.0162565	5
	3			(-)	0.78	0.74	0.74	0.55	0.41					IV = 60%Dioxane/35%H2O/5%HCl						3		0.792099	0.238096	1.78259	0.386243	0.936239	0.876543	0.122141	0.0191412	0.0191412	5
	4			(-)	0.78	0.73	0.72	0.52	0.38					V = 50%Dioxane/45%H2O/5%HCl						4		0.910262	0.223191	1.92176	0.362064	0.950664	0.903762	0.114495	0.013057	0.013057	5
	5			(-)	0.78	0.7	0.7	0.47	0.31					VI = 40%Dioxane/55%H2O/5%HCl						5		1.15149	0.249256	2.21447	0.404346	0.953454	0.909074	0.127866	0.0119703	0.0119703	5
	6			(-)	0.74	0.7	0.7	0.49	0.33											6		0.972338	0.270802	1.90899	0.439299	0.92893	0.862911	0.138919	0.0224997	0.0224997	5
	7			(-)	0.74	0.7	0.7	0.51	0.33											7		0.94454	0.272848	1.87424	0.442617	0.925564	0.856669	0.139968	0.0241045	0.0241045	5
	8			(-)	0.74	0.68	0.66	0.47	0.28											8		1.14358	0.249527	2.1084	0.404786	0.948911	0.900433	0.128005	0.0137551	0.0137551	5
	9			0.75	0.65	0.55	0.42	0.11	0											9		2.26849	0.473002	3.17926	0.662336	0.940636	0.884796	0.209449	0.0172074	0.0172074	5
	10			0.75	0.65	0.59	0.47	0.14	0											10		1.98371	0.478987	2.85201	0.670717	0.926117	0.857692	0.212099	0.0238387	0.0238387	5
	11			0.74	0.64	0.58	0.47	0.13	0											11		2.00989	0.510945	2.86172	0.715466	0.917656	0.842092	0.22625	0.0280121	0.0280121	5
	12			(-)	0.75	0.72	0.72	0.54	0.4											12		0.749975	0.238842	1.64696	0.387453	0.926072	0.857609	0.122523	0.0238601	0.0238601	5
	13			(-)	0.73	0.7	0.7	0.5	0.33											13		0.93614	0.282058	1.84702	0.457559	0.918976	0.844517	0.144693	0.0273466	0.0273466	5
	14			(-)	0.78	0.69	0.66	0.45	0.27											14		1.30552	0.214482	2.3979	0.347936	0.96984	0.94059	0.110027	0.00625894	0.00625894	5
	15			(-)	0.74	0.7	0.7	0.51	0.35											15		0.890338	0.253278	1.79681	0.410872	0.929733	0.864404	0.129929	0.0221221	0.0221221	5
	16			(-)	0.74	0.7	0.7	0.5	0.35											16		0.904237	0.252998	1.81418	0.410417	0.931075	0.8669	0.129785	0.0214961	0.0214961	5
	17			(-)	0.75	0.71	0.71	0.49	0.35											17		0.945176	0.263222	1.89817	0.427002	0.93177	0.868196	0.13503	0.0211738	0.0211738	5
	18			(-)	0.75	0.71	0.7	0.48	0.3											18		1.10205	0.288854	2.11382	0.468584	0.933552	0.871519	0.148179	0.0203554	0.0203554	5
	19			(-)	0.7	0.66	0.63	0.53	0.13											19		1.55104	0.579928	2.62299	0.940768	0.849438	0.721545	0.297497	0.0685248	0.0685248	5
	20			(-)	0.75	0.76	0.78	0.63	0.5											20		0.382517	0.28821	1.22371	0.467538	0.833934	0.695446	0.147848	0.0791825	0.0791825	5
	21			(-)	0.73	0.71	0.71	0.52	0.39											21		0.753893	0.249861	1.60655	0.405328	0.916328	0.839657	0.128176	0.0286865	0.0286865	5
	22			(-)	0.78	0.76	0.78	0.6	0.48											22		0.547772	0.270279	1.49338	0.43845	0.891368	0.794536	0.13865	0.0422734	0.0422734	5
	23			(-)	0.73	0.71	0.71	0.51	0.38											23		0.793483	0.258933	1.66062	0.420045	0.915951	0.838966	0.13283	0.0288788	0.0288788	5
		Table S7	logD (pH 0.5) values of the investigated substances determined by interpolation method
		Compound			RF (70%MeOH)	RM	logD (pH 0.5)									Standard compounds	pKa1	pKa2	logP	logD	RF	RM
		1			0.48	0.0347621	-8.62484									hlorokin	10.18	8.38	4.72	-12.84	0.69	-0.347487
		2			0.47	0.052178	-8.38949									oksazepam	10.9	1.55	2.24	-9.24708	0.42	0.140179
		3			0.44	0.104735	-7.67925									klonazepam	10.5	1.5	2.41	-8.63139	0.55	-0.0871502
		4			0.4	0.176091	-6.71498									1-naftol	9.34	(-)	2.85	-5.99	0.39	0.194265
		5			0.34	0.288065	-5.20182									2,4-dihlorfenol	7.89	(-)	3.06	-4.33	0.34	0.288065
		6			0.44	0.104735	-7.67925									lorazepam	13	(-)	2.39	-10.11	0.48	0.0347621
		7			0.44	0.104735	-7.67925									fluoren	(-)	(-)	4.18	4.18	0.09	1.0048
		8			0.39	0.194265	-6.46939									fenantren	(-)	(-)	4.46	4.49	0.09	1.0048
		9			0.05	1.27875	8.18586									antracen	(-)	(-)	4.45	4.45	0.09	1.0048
		10			0.05	1.27875	8.18586
		11			0.05	1.27875	8.18586
		12			0.44	0.104735	-7.67925
		13			0.42	0.140179	-7.20029
		14			0.34	0.288065	-5.20182
		15			0.45	0.0871502	-7.91689
		16			0.42	0.140179	-7.20029
		17			0.45	0.0871502	-7.91689
		18			0.41	0.158068	-6.95854
		19			0.3	0.367977	-4.12194
		20			0.48	0.0347621	-8.62484
		21			0.45	0.0871502	-7.91689
		22			0.5	0	-9.09459
		23			0.44	0.104735	-7.67925

## Sheet: Compounds molecular descriptors
Structural descriptors for protonated structures
Compound		Potential Energy-S-OPLS	Times Found-S-OPLS	#stars	#amine	#rotor	CNS	mol MW	dipole	SASA	FOSA	FISA	PISA	WPSA	volume	donorHB	accptHB	dip^2/V	ACxDN^.5/SA	glob	QPpolrz	QPlogPC16	QPlogPoct	QPlogPw	QPlogPo/w	QPlogS	CIQPlogS	QPlogHERG	QPPCaco	QPlogBB	QPPMDCK	QPlogKp	IP(eV)	EA(eV)	#metab	QPlogKhsa	HumanOralAbsorption	PercentHumanOralAbsorption	SAfluorine	PSA	#NandO	RuleOfFive	RuleOfThree	#ringatoms	#in56	#noncon	#nonHatm	Jm	NDDO Heat of Formation
1		-56.043	15	0	1	6	1	369.936	6.572	606.645	340.495	39.331	155.539	71.28	1161.25	2	3.5	0.0371911	0.0081592	0.88074	37.952	11.409	17.677	7.583	4.584	-4.007	-4.725	-4.93	1046.71	0.437	1412.97	-3.183	8.157	0.669	4	0.782	3	100	0	34.315	3	0	0	20	20	10	26	0.023868	344.938
2		-55.504	4	0	1	7	2	383.963	6.419	586.757	356.744	22.791	139.219	68.003	1168.16	2	3.5	0.0352672	0.0084358	0.914198	37.43	11.321	17.424	7.09	4.724	-3.481	-5.011	-4.31	1502	0.525	2003.12	-2.84	8.097	0.621	4	0.772	3	100	0	31.523	3	0	0	20	20	10	27	0.183496	335.382
3		-45.335	14	0	1	8	1	397.99	5.593	622.287	384.584	27.508	146.167	64.028	1232.47	2	3.5	0.0253855	0.0079541	0.893361	39.429	11.86	17.932	7.032	5.082	-3.926	-5.297	-4.681	1355.02	0.407	1704.48	-2.806	8.251	0.75	4	0.895	3	100	0	32.375	3	1	0	20	20	10	28	0.07375	326.742
4		-36.034	19	0	1	10	1	426.043	5.71	656.834	433.251	21.207	137.076	65.301	1326.55	2	3.5	0.0245786	0.0075358	0.888913	41.823	12.548	18.684	6.57	5.715	-4.219	-5.873	-4.709	1554.86	0.341	2009.76	-2.53	8.291	0.795	4	1.065	3	100	0	32.304	3	1	0	20	20	10	30	0.075972	310.062
5		-29.488	18	0	1	12	1	454.097	5.165	698.151	484.441	26.622	121.054	66.034	1451.41	2	3.5	0.0183827	0.0070898	0.887995	45.382	13.51	19.847	6.157	6.457	-4.635	-6.451	-4.648	1381.47	0.176	1785.08	-2.494	8.248	0.755	4	1.324	1	100	0	33.323	3	1	0	20	20	10	32	0.033742	304.193
6		33.385	8	0	1	6	2	403.49	7.428	679.472	391.328	38.522	137.15	112.472	1255.93	2	3.5	0.0439351	0.0072847	0.828521	41.565	10.844	19.048	7.642	5.304	-5.48	-5.41	-5.687	1065.37	0.502	2421.44	-3.233	8.321	0.932	4	1.019	3	100	112.472	34.357	3	1	0	20	20	10	29	0.000782	197.253
7		36.315	4	0	1	7	2	417.516	7.22	615.323	351.728	22.897	134.231	106.467	1229.74	2	3.5	0.0423928	0.0080442	0.902133	39.847	10.6	18.542	7.139	5.248	-4.151	-5.698	-4.482	1498.54	0.614	3245.89	-2.859	8.258	0.885	4	0.934	3	100	106.467	31.608	3	1	0	20	20	10	30	0.0408	187.633
8		-59.307	5	0	1	7	1	383.963	6.011	597.523	347.182	42.233	146.639	61.468	1164.42	2	3.5	0.0310288	0.0082838	0.895814	37.352	11.369	17.353	7.296	4.542	-3.641	-5.011	-4.643	982.434	0.34	1165.82	-3.172	8.176	0.689	4	0.754	3	100	0	35.407	3	0	0	20	20	10	27	0.059038	344.428
9		6.947	5	3	1	10	1	546.237	6.308	795.429	575.255	19.672	131.43	69.071	1662.97	1	4	0.0239243	0.0050287	0.853401	55.232	15.105	22.225	5.884	7.874	-6.751	-8.246	-5.257	1607.88	0.349	2185.43	-2.522	8.152	0.662	4	1.984	1	100	0	22.432	3	2	1	30	30	20	39	0.000292	304.68
10		-2.622	5	3	1	12	1	574.291	5.541	850.945	622.41	23.238	142.681	62.616	1750.29	1	4	0.0175398	0.0047007	0.825412	57.55	16.013	22.799	5.675	8.393	-7.416	-8.833	-5.764	1487.42	0.165	1851.91	-2.356	8.25	0.749	4	2.139	1	100	0	26.045	3	2	1	30	30	20	41	9.7e-05	283.574
11		-3.662	3	3	1	12	1	574.291	5.646	866.176	645.666	22.701	133.028	64.78	1784.21	1	4	0.0178635	0.004618	0.821339	58.815	16.261	23.236	5.643	8.611	-7.706	-8.833	-5.783	1504.95	0.173	1927.41	-2.38	8.282	0.785	4	2.234	1	100	0	27.54	3	2	1	30	30	20	41	4.7e-05	281.81
12		-139.116	18	0	1	7	2	397.99	6.441	657.254	426.075	20.632	144.23	66.317	1297.34	2	3.5	0.031981	0.007531	0.875252	42.648	12.338	19.123	7.278	5.541	-4.719	-5.297	-4.965	1574.52	0.523	2063.53	-2.782	8.076	0.613	4	1.108	3	100	0	29.283	3	1	0	20	20	10	28	0.012547	325.873
13		-45.826	27	0	1	7	2	431.543	7.217	649.785	395.501	19.319	130.458	104.506	1281.53	2	3.5	0.0406379	0.0076175	0.878107	41.884	10.954	19.138	7.171	5.58	-4.753	-5.986	-4.853	1620.29	0.63	3445.57	-2.807	8.232	0.872	4	1.066	3	100	104.506	29.426	3	1	0	20	20	10	31	0.011906	177.893
14		-147.26	65	0	1	8	1	412.017	5.475	637.435	384.81	43.114	145.828	63.683	1251.59	2	3.5	0.0239463	0.0077651	0.881125	40.191	12.104	18.22	7.173	5.089	-4.193	-5.585	-4.877	963.72	0.266	1174.19	-3.095	8.33	0.816	4	0.943	3	100	0	35.966	3	1	0	20	20	10	29	0.021248	322.056
15		-81.97	7	0	1	7	1	363.545	5.146	626.311	418.258	20.537	187.516	0	1229.36	2	3.5	0.0215373	0.007903	0.886124	40.341	11.608	17.92	7.474	4.912	-3.881	-4.595	-4.995	1577.79	0.366	895.98	-2.628	7.944	0.424	5	0.926	3	100	0	29.251	3	0	0	20	20	10	27	0.112646	328.994
16		-66.272	24	0	1	9	1	391.598	3.09	654.301	429.928	41.962	182.411	0	1302.75	2	3.5	0.007328	0.0075649	0.881646	41.945	12.344	18.337	7.211	5.222	-4.052	-5.166	-5.043	988.272	0.06	540.371	-2.849	8.17	0.615	4	1.04	3	100	0	36.138	3	1	0	20	20	10	29	0.049222	315.822
17		-132.229	46	2	0	5	1	417.98	5.89	741.997	304.019	32.695	333.849	71.434	1329.95	2	2.5	0.0260874	0.0047649	0.788229	47.048	14.202	20.152	8.312	6.803	-8.14	-7.496	-6.551	4851.25	0.087	6714.19	-0.466	8.198	0.929	4	1.435	1	100	0	33.618	3	1	1	26	26	10	30	0.001037	354.442
18		-119.652	17	1	0	5	0	417.98	5.79	675.286	260.598	46.304	296.948	71.435	1268.6	2	2.5	0.0264236	0.0052356	0.839253	44.241	13.368	19.381	7.993	6.286	-6.922	-7.496	-5.549	3604.12	-0.001	4869.73	-0.847	8.214	0.911	5	1.277	1	100	0	35.137	3	1	1	26	26	10	30	0.007112	363.03
19		-93.409	11	3	0	6	0	482.067	4.475	813.054	307.281	43.299	391.046	71.428	1496.68	2	2.5	0.0133809	0.0043485	0.778272	53.625	16.285	22.4	8.724	7.866	-9.282	-9.069	-6.985	3848.51	-0.099	5227.15	-0.364	8.022	1.183	4	1.858	1	100	0	33.643	3	1	1	30	30	10	35	0.000109	370.806
20		182.375	50	0	1	2	2	395.974	4.548	682.775	407.815	20.196	183.33	71.435	1253.27	0	4	0.0165036	0	0.823349	44.469	11.799	16.942	6.271	5.344	-5.828	-5.23	-5.991	1589.58	0.818	2223.87	-3.116	8.564	0.945	2	1.101	3	100	0	18.348	3	1	1	26	26	14	28	0.00045	354.091
21		152.727	39	0	1	3	2	410.001	4.865	721.825	443.802	23.128	183.459	71.437	1316.86	0	4	0.017972	0	0.804931	46.372	12.443	17.554	6.165	5.739	-6.405	-5.528	-6.289	1491.01	0.719	2075.26	-3.074	8.564	0.943	2	1.243	1	100	0	20.875	3	1	1	26	26	14	29	0.000136	351.156
22		122.32	96	0	3	11	2	510.164	4.55	744.71	495.76	32.622	146.245	70.084	1533.73	2	7.5	0.0135001	0.0142426	0.863663	49.56	14.453	23.472	10.643	4.313	-1.879	-4.033	-6.614	75.379	0.578	99.163	-4.675	8.314	0.791	6	0.845	3	72.837	0	41.099	5	1	0	26	26	14	36	0.142541	560.862
23		125.496	42	0	3	12	1	524.191	5.838	760.793	513.998	40.366	138.088	68.341	1580.85	2	7.5	0.021563	0.0139415	0.862633	50.725	14.825	23.996	10.457	4.537	-1.983	-4.318	-6.592	63.652	0.443	80.802	-4.75	8.35	0.821	6	0.927	2	72.835	0	43.228	5	1	0	26	26	14	37	0.096826	557.394
Structural descriptors for neutral structures
Compound		Potential Energy-S-OPLS	Times Found-S-OPLS	#stars	#amine	#rotor	CNS	mol MW	dipole	SASA	FOSA	FISA	PISA	WPSA	volume	donorHB	accptHB	dip^2/V	ACxDN^.5/SA	glob	QPpolrz	QPlogPC16	QPlogPoct	QPlogPw	QPlogPo/w	QPlogS	CIQPlogS	QPlogHERG	QPPCaco	QPlogBB	QPPMDCK	QPlogKp	IP(eV)	EA(eV)	#metab	QPlogKhsa	HumanOralAbsorption	PercentHumanOralAbsorption	SAfluorine	PSA	#NandO	RuleOfFive	RuleOfThree	#ringatoms	#in56	#noncon	#nonHatm	Jm	First Zagreb
1		55.744	10	0	1	6	2	369.936	4.427	562.813	328.153	23.763	141.47	69.428	1107.99	2	3.5	0.0176913	0.0087947	0.920078	35.686	10.864	16.61	7.275	4.349	-3.232	-4.725	-4.226	1470.48	0.584	1993.23	-2.946	8.435	0.907	4	0.655	3	100	0	31.475	3	0	0	20	20	10	26	0.245661	148
2		-9.057	4	0	1	7	2	383.963	4.53	625.512	375.945	27.316	152.739	69.512	1193.16	2	3.5	0.0171953	0.0079131	0.869749	38.56	11.551	17.485	7.306	4.854	-4.17	-5.011	-5.094	1360.69	0.47	1834.81	-2.875	8.476	0.913	4	0.822	3	100	0	29.281	3	0	0	20	20	10	27	0.034604	152
3		-0.517	16	0	1	8	1	397.99	5.126	612.887	368.785	29.992	149.46	64.649	1199.4	2	3.5	0.021907	0.0080761	0.890759	38.136	11.614	17.427	7.049	4.861	-3.763	-5.297	-4.739	1283.46	0.387	1620.05	-2.84	8.469	0.919	4	0.805	3	100	0	32.821	3	0	0	20	20	10	28	0.099265	156
4		3.437	4	0	1	10	1	426.043	5.567	655.749	428.612	24.241	136.861	66.035	1319.27	2	3.5	0.0234917	0.0075482	0.887121	41.529	12.51	18.574	6.587	5.65	-4.203	-5.873	-4.737	1455.19	0.316	1888.28	-2.587	8.416	0.882	4	1.045	3	100	0	32.369	3	1	0	20	20	10	30	0.069197	164
5		14.565	4	0	1	12	1	454.097	5.888	688.324	491.704	21.97	124.974	49.676	1418.75	2	3.5	0.0244395	0.007191	0.887106	44.113	13.122	19.366	6.122	6.223	-4.387	-6.451	-4.681	1529.17	0.175	1620.8	-2.395	8.428	0.903	4	1.233	1	100	0	33.918	3	1	0	20	20	10	32	0.075008	172
6		124.538	12	0	1	6	2	403.49	5.074	583.455	324.757	23.673	124.576	110.449	1162.54	2	3.5	0.0221473	0.0084835	0.916422	37.708	9.989	17.57	7.224	4.828	-3.771	-5.41	-4.205	1473.37	0.684	3351.16	-3.003	8.608	1.155	4	0.8	3	100	110.449	31.689	3	0	0	20	20	10	29	0.067815	166
7		59.628	7	0	1	7	2	417.516	5.511	646.351	372.163	27.295	138.646	108.247	1241.27	2	3.5	0.024472	0.007658	0.864186	40.351	10.677	18.381	7.274	5.288	-4.708	-5.698	-5.117	1361.33	0.562	2992.3	-2.925	8.646	1.159	4	0.95	3	100	108.247	29.312	3	1	0	20	20	10	30	0.009728	170
8		23.462	3	0	1	7	1	383.963	4.291	586.863	336.411	40.571	140.436	69.445	1160.78	2	3.5	0.0158609	0.0084342	0.910181	37.147	11.387	17.139	7.22	4.559	-3.489	-5.011	-4.381	1018.74	0.384	1340.79	-3.163	8.41	0.882	4	0.75	3	100	0	33.854	3	0	0	20	20	10	27	0.085524	152
9		-16.772	9	3	1	10	1	546.237	6.523	876.485	617.266	26.148	161.98	71.09	1712.76	1	4	0.0248411	0.0045637	0.789863	57.517	16.164	22.834	6.332	8.177	-8.249	-8.246	-6.431	1395.85	0.254	1924.05	-2.533	8.298	0.767	4	2.109	1	100	0	25.875	3	2	1	30	30	20	39	9e-06	232
10		-73.179	5	3	1	12	1	574.291	5.71	840.994	617.333	23.11	136.81	63.742	1747.68	1	4	0.018658	0.0047563	0.834347	57.389	15.905	22.797	5.611	8.376	-7.238	-8.833	-5.591	1491.59	0.174	1884.09	-2.374	8.341	0.814	4	2.133	1	100	0	25.98	3	2	1	30	30	20	41	0.00014	240
11		-71.967	5	3	1	12	1	574.291	5.708	871.632	646.341	21.292	138.264	65.734	1783.88	1	4	0.0182672	0.0045891	0.816097	58.852	16.328	23.233	5.683	8.627	-7.811	-8.833	-5.893	1551.98	0.187	2016.72	-2.335	8.411	0.877	4	2.231	1	100	0	26.318	3	2	1	30	30	20	41	4.1e-05	240
12		-76.43	10	0	1	7	2	397.99	5.005	646.438	419.215	21.572	139.517	66.134	1282.58	2	3.5	0.0195278	0.007657	0.883134	42.012	12.194	18.748	7.226	5.437	-4.526	-5.297	-4.815	1542.52	0.518	2013.58	-2.816	8.33	0.817	4	1.07	3	100	0	29.176	3	1	0	20	20	10	28	0.018104	158
13		-6.73	36	0	1	7	2	431.543	5.977	651.656	408.305	21.56	117.483	104.308	1310.91	2	3.5	0.0272499	0.0075956	0.888919	42.936	11.145	19.366	7.102	5.739	-4.785	-5.986	-4.616	1542.92	0.614	3259.9	-2.894	8.496	1.068	4	1.15	3	100	104.308	29.233	3	1	0	20	20	10	31	0.009044	176
14		-110.574	3	0	1	8	1	412.017	5.39	651.085	430.824	28.072	128.976	63.212	1314.78	2	3.5	0.0220981	0.0076023	0.891446	42.558	12.43	18.988	6.988	5.577	-4.433	-5.585	-4.63	1338.41	0.399	1664.69	-2.877	8.459	0.93	4	1.119	3	100	0	31.305	3	1	0	20	20	10	29	0.020176	162
15		-38.824	6	0	1	7	1	363.545	3.433	623.344	421.784	18.39	183.17	0	1241.71	2	3.5	0.0094894	0.0079406	0.896295	40.794	11.691	17.937	7.423	5.004	-3.828	-4.595	-4.81	1653.52	0.388	942.552	-2.604	8.197	0.636	4	0.964	3	100	0	29.162	3	1	0	20	20	10	27	0.134415	152
16		-66.571	8	0	1	9	1	391.598	3.717	653.205	437.81	40.337	175.057	0	1297.73	2	3.5	0.0106471	0.0075776	0.880859	41.674	12.237	18.262	7.148	5.192	-4.032	-5.166	-5.021	1023.96	0.073	561.49	-2.845	8.194	0.644	4	1.026	3	100	0	35.834	3	1	0	20	20	10	29	0.051964	160
17		-99.789	13	3	0	5	1	417.98	7.312	739.625	305.552	30.464	332.184	71.425	1321.23	2	2.5	0.0404685	0.0047802	0.787297	46.683	14.096	20.201	8.28	6.76	-8.096	-7.496	-6.558	5093.42	0.11	7076.37	-0.431	7.764	0.953	5	1.41	1	100	0	33.202	3	1	1	26	26	10	30	0.001243	174
18		-206.056	5	0	0	5	1	417.98	4.447	623.474	241.861	45.612	280.962	55.039	1221.55	2	2.5	0.0161877	0.0056707	0.886382	42.205	12.764	18.573	7.749	5.922	-5.913	-7.496	-4.71	3658.99	0.01	4025.15	-0.89	8.151	1.043	5	1.159	3	100	0	35.031	3	1	1	26	26	10	30	0.0658	174
19		22.72	15	4	0	6	1	482.067	7.09	827.508	321.809	31.317	402.954	71.428	1505.81	2	2.5	0.0333812	0.0042725	0.767785	54.104	16.442	22.75	8.758	8.019	-9.548	-9.069	-7.211	4999.42	0.023	6935.57	-0.101	7.762	1.089	5	1.881	1	100	0	32.22	3	1	1	30	30	10	35	0.000108	204
20		233.813	15	0	1	2	2	395.974	5.413	680.727	405.642	21.539	182.107	71.438	1246.74	0	4	0.0235053	0	0.822956	44.196	11.74	16.944	6.266	5.291	-5.789	-5.23	-5.991	1543.64	0.805	2154.59	-3.146	8.456	0.929	2	1.082	3	100	0	19.37	3	1	1	26	26	14	28	0.000461	166
21		170.387	10	0	1	3	2	410.001	5.686	718.036	440.025	24.602	181.971	71.437	1308.57	0	4	0.0247078	0	0.805779	46.026	12.364	17.531	6.156	5.673	-6.333	-5.528	-6.269	1443.76	0.704	2004.28	-3.106	8.455	0.928	2	1.219	1	100	0	21.027	3	1	1	26	26	14	29	0.000149	170
22		190.773	3	1	3	11	2	510.164	6.782	920.971	628.75	34.83	185.959	71.432	1687.33	2	7.5	0.0272604	0.0115168	0.744252	56.086	16.839	25.484	11.353	5.23	-4.953	-4.033	-8.736	71.83	0.454	95.74	-4.575	8.331	0.803	6	1.173	2	64.876	0	44.2	5	2	0	26	26	14	36	0.000151	198
23		156.113	2	1	3	12	1	524.191	5.661	950.015	646.277	46.135	186.17	71.432	1742.47	2	7.5	0.0183913	0.0111647	0.737131	57.652	17.515	25.909	11.28	5.496	-5.305	-4.318	-8.852	56.118	0.247	73.319	-4.687	8.32	0.794	6	1.275	2	64.515	0	46.343	5	2	0	26	26	14	37	5.3e-05	202
[truncated: 156 more columns]

## Sheet: Details of PLS (logD)
QSPR analysis - Details of PLS regression analysis
							Compound		Scores on LV 1 (82.02%)	Scores on LV 2 (10.46%)	Y Measured 1 logD	Y Predicted 1 logD	Leverage	Y Stdnt Residual 1 logD	Hotelling T^2 (92.48%)	Q Residuals (7.52%)
							1	training	-4.95227	1.19864	-8.62	-8.36206	0.0649362	0.25386	1.03898	0.881168
	Preprocessing: Autoscale						3	training	-3.84504	1.00101	-7.68	-7.64728	0.0410792	0.0318042	0.657267	0.609378
	Num. LVs: 2						4	training	-2.77	0.689819	-6.71	-7.06753	0.0206909	-0.343838	0.331054	3.07209
	Cross validation: leave one out						6	training	-2.63322	0.821811	-7.68	-6.82946	0.0221889	0.818585	0.355022	2.36175
	RMSEC: 0.917502						7	training	-2.11707	0.707464	-7.68	-6.51753	0.0152525	1.11485	0.244041	2.4862
	RMSECV: 1.23112						8	training	-4.41915	1.02785	-6.47	-8.09032	0.0504618	-1.58249	0.807389	0.764244
	RMSEP: 0.927124						11	training	14.0136	1.95517	8.19	7.84764	0.410673	-0.424429	6.57076	0.475198
	Bias: 0						10	training	13.9485	1.89813	8.19	7.73988	0.404244	-0.555003	6.4679	0.608787
	CV Bias: 0.0184287						12	training	-3.11727	1.17487	-7.68	-6.88658	0.0372686	0.769565	0.596298	0.359413
	Pred Bias:0.148523						15	training	-4.41565	1.13465	-7.92	-7.98519	0.0536917	-0.0637741	0.859067	0.597596
	R^2 Cal: 0.967928						14	training	-2.65041	0.932757	-5.2	-6.73725	0.0251233	-1.48172	0.401973	0.675346
	R^2 CV: 0.942278						16	training	-3.3411	0.694344	-7.2	-7.5295	0.0271119	-0.317918	0.43379	1.56503
	R^2 Pred: 0.981486						18	training	-0.754287	-1.44498	-6.96	-7.46608	0.0307397	-0.489207	0.491835	8.33449
							19	training	5.06837	-1.01792	-4.12	-2.30303	0.0613475	1.78481	0.981561	12.8175
	Percent Variance Captured by Regression Model						20	training	-1.53702	-0.778925	-8.62	-7.46733	0.0129184	1.10414	0.206695	10.4378
							22	training	1.5401	-4.91201	-9.09	-8.91285	0.347591	0.208732	5.56145	2.27734
	-----X-Block----- -----Y-Block-----						23	training	1.98192	-5.08267	-7.68	-8.71554	0.374682	-1.24627	5.99492	2.20124
	Comp This Total This Total						2	test	-4.38966	1.11454	-8.39	-7.98324	NaN	0.387114	0.842126	0.62807
	---- ------- ------- ------- -------						5	test	-1.51243	0.452865	-5.2	-6.26767	NaN	-1.01609	0.113087	7.61121
	1 82.02 82.02 82.35 82.35						9	test	12.9242	2.29332	8.19	7.28197	NaN	-0.864163	6.04594	3.37089
	2 10.46 92.48 14.44 96.79						13	test	-0.958877	0.68845	-7.2	-5.5901	NaN	1.53213	0.134585	5.39819
							17	test	-0.754717	-1.67601	-7.92	-7.68766	NaN	0.221119	0.655989	11.254
							21	test	-1.05688	-1.01584	-7.92	-7.30217	NaN	0.58798	0.267337	8.51057
							Descriptor	VIP Scores for logD	Reg Vector for logD
							#stars	0.968391	0.0394956
							QPlogPw	1.55448	-0.0968423
							QPlogPo/w	1.09475	0.052139
							CIQPlogS	0.915375	-0.0485291
							QPlogKhsa	1.10533	0.0465365
							#noncon	0.871498	0.0304957
							1Z	0.886904	0.0118891
							2Z	0.906291	0.01364
							NSI	0.841324	0.00758128
							Q	0.953871	0.0234559
							H	0.891056	0.0127272
							R	0.895816	0.0211792
							C	0.923535	0.0233257
							ECC	1.09231	-0.0807545
							VCIC1	0.82346	0.0160937
							VCIC2	0.958178	0.0281007
							VCIC3	0.980261	0.0292018
							VCIC4	1.0893	0.0384673
							VCIC5	1.12315	0.041511
							1M	0.841692	0.0159708
							TCIO1	0.979927	0.0364667
							TCIO3	1.02912	0.0418795
							TCIO9	1.40052	0.0628741
							TCIO10	0.860235	0.0254229
							RHDPI	0.881824	0.0108854		Graphic S1: Plot of the regression coefficients of descriptors of PLS model for for logD values obtained by interpolation method. Variables with VIP score >1 are marked in blue.
							SRDS	0.875523	0.0102344
							SCIX2	0.871058	0.0113328
							SCIX3	0.86942	0.00895198
							SCIX4	0.923437	0.0169532
							SCIX5	0.908583	0.0157193
							CIX2	0.86933	0.0117354
							CIX3	0.874157	0.00924005
							CIX4	0.931717	0.0173893
							CIX5	0.919376	0.0162187
							RDSRI	0.912176	0.0146859
							RC6	0.91003	0.0197023
							BC	0.844469	0.0078614
							Cnum	0.91003	0.0197023
							Nnrs	1.49709	-0.0958147
							RF	1.58424	0.0982708
							TRS	0.91003	0.0197023
							RBC	1.52073	0.0678134

## Sheet: Details of PLS (RM0 MeOH)
QSPR analysis - Details of PLS regression analysis
PLS analysis of RM0 values as dependent variable obtained in chromatographic system Methanol/Water/Hydrochloric acid
								Compound		Scores on LV 1 (52.08%)	Scores on LV 2 (33.82%)	Y Measured 2 RM0 MeOH	Y Predicted 2 RM0 MeOH	Leverage	Y Stdnt Residual 2 RM0 MeOH	Hotelling T^2 (85.91%)	Q Residuals (14.09%)
								1	training	-2.8896	2.01584	2.08094	2.2229	0.0547772	0.423887	0.876435	0.683711
								3	training	-1.88493	2.36125	2.34815	2.50532	0.0455188	0.46701	0.728301	0.818712
								4	training	-0.913481	2.42101	2.89917	2.76068	0.0369742	-0.40969	0.591587	3.02929
	Preprocessing: Autoscale							6	training	-1.60666	1.11927	2.42121	2.49711	0.0169142	0.222219	0.270628	3.0152
	Num. LVs: 2							7	training	-1.3384	1.83995	2.60598	2.61313	0.026266	0.0210295	0.420256	2.50619
	Cross validation: leave one out							8	training	-2.50143	2.25286	2.71345	2.33871	0.0527716	-1.1178	0.844346	1.36641
	RMSEC: 0.306679							11	training	10.1024	0.0379005	5.50366	5.45862	0.382736	-0.166413	6.12378	1.29639
	RMSECV: 0.387964							10	training	9.96537	-0.026272	5.45556	5.419	0.37242	-0.133967	5.95873	1.51947
	RMSEP: 0.34994							12	training	-1.54121	1.79475	2.4121	2.5577	0.0275075	0.428617	0.440121	0.522094
	Bias: 0							15	training	-2.28922	2.14012	2.30975	2.38636	0.0460996	0.227712	0.737594	0.636129
	CV Bias: -0.0118783							14	training	-1.32797	1.63555	3.29315	2.60262	0.0220596	-2.02711	0.352954	4.02227
	Pred Bias:-0.0948569							16	training	-1.38273	2.27582	2.5841	2.62981	0.0370772	0.135245	0.593235	2.90805
	R^2 Cal: 0.920827							18	training	-0.49464	-1.04592	2.66385	2.6451	0.00723433	-0.0546312	0.115749	11.5374
	R^2 CV: 0.874117							19	training	4.15105	-1.24407	3.68522	3.83503	0.0735557	0.451852	1.17689	14.6197
	R^2 Pred: 0.927394							20	training	-1.34027	-1.65265	1.5449	2.38697	0.0225074	2.47253	0.360119	17.1956
								22	training	-2.72739	-8.21434	1.56032	1.60387	0.417519	0.165628	6.68031	2.59691
	Percent Variance Captured by Regression Model							23	training	-1.98088	-7.71109	2.21106	1.82965	0.35806	-1.38196	5.72897	3.88577
								2	test	-2.51465	2.47628	2.33973	2.34972	NaN	0.0290104	0.945944	1.50445
	-----X-Block----- -----Y-Block-----							5	test	0.0618065	2.40798	3.7376	3.01233	NaN	-2.10547	0.535935	6.83039
	Comp This Total This Total							9	test	8.8634	0.0232032	5.44631	5.13691	NaN	-0.898205	4.71376	4.85685
	---- ------- ------- ------- -------							13	test	-0.568804	1.25432	2.62607	2.77453	NaN	0.430983	0.16477	2.80041
	1 52.08 52.08 88.50 88.50							17	test	-0.34163	-1.60418	2.64295	2.64864	NaN	0.0165267	0.244755	18.6891
	2 33.82 85.91 3.58 92.08							21	test	-0.861882	-1.5043	2.21902	2.5204	NaN	0.874921	0.253639	17.6368
								Descriptor	VIP Scores for RM0 (MeOH)	Reg Vector for RM0 (MeOH)
								IP(eV)	0.282662	-0.0339593
								SP	0.282913	-0.0338555
								Tot Q	0.275895	-0.0334422
								TF-S-OPLS	0.442931	-0.039184
								#stars	1.5787	0.0522939
								#rotor	0.571778	0.04205
								QPlogPw	0.615972	-0.0430404
								QPlogPo/w	1.68121	0.0555679
								CIQPlogS	1.54413	-0.05603
								QPlogHERG	0.183324	0.0173774
								QPlogPw	1.66792	0.0526931
								QPlogPo/w	0.275887	0.0334416
								CIQPlogS	0.275895	-0.0334422
								QPlogHERG	1.19159	0.0532196
								LUMO	0.859174	0.0524645
								2Z	1.21885	0.0393805
								Q	1.32263	0.03999
								H	1.20121	0.0402574
								C	1.23427	0.0445233
								VCIC2	1.22371	0.0431891
								VCIC3	1.24069	0.0427128
								VCIC4	1.36031	0.0455911
								VCIC5	1.37995	0.0460876
								TCIO3	1.44874	0.0458859
								TCIO9	1.69867	0.0574058			Graphic S2: Plot of the regression coefficients of descriptors of PLS model for for RM0 values obtained in chromatographic system with methanol in mobile phase. Variables with VIP score >1 are marked in blue.
								STDNN	0.210223	-0.0297105
								SCIX4	1.25353	0.0397032
								CIX4	1.27062	0.0400706
								CIX5	1.24527	0.038421
								RDSRI	1.24243	0.0405319
								Nnrs	0.822044	-0.0587706
								RF	0.896867	0.0605191

## Sheet: Details of PLS (RM0 Ac)
QSPR analysis - Details of PLS regression analysis
PLS analysis of RM0 values as dependent variable obtained in chromatographic system Acetone/Water/Hydrochloric acid
										Compound		Scores on LV 1 (46.24%)	Scores on LV 2 (26.54%)	Y Measured 3 RM0 Ac	Y Predicted 3 RM0 Ac	Leverage	Y Stdnt Residual 3 RM0 Ac	Hotelling T^2 (72.78%)	Q Residuals (27.22%)
										1	training	-2.32323	2.16662	1.73822	1.82071	0.0591962	0.343915	0.947139	0.928918
										3	training	-1.47131	2.38558	1.83762	1.96516	0.0526743	0.529911	0.842788	0.732729
										4	training	-0.731359	2.21311	2.03607	2.07381	0.0395425	0.155765	0.63268	3.47929
	Preprocessing: Autoscale									6	training	-1.31393	0.666272	2.0143	1.9103	0.0108996	-0.422903	0.174394	7.19031
	Num. LVs: 2									7	training	-0.924638	1.83513	2.01227	2.02583	0.0293131	0.0556795	0.469009	5.63908
	Cross validation: leave one out									8	training	-1.93485	2.58955	2.22711	1.90153	0.067268	-1.36332	1.07629	1.67342
	RMSEC: 0.208746									11	training	9.82661	0.1746	3.75869	3.64379	0.42124	-0.610773	6.73985	1.10952
	RMSECV: 0.305864									10	training	9.70382	0.23409	3.64721	3.62719	0.410969	-0.105485	6.57551	1.47057
	RMSEP: 0.265293									12	training	-1.02421	1.63279	1.83508	2.00076	0.0248281	0.678485	0.397249	0.449266
	Bias: -4.44089e-016									15	training	-1.77316	2.18505	1.74235	1.90828	0.0499809	0.688443	0.799695	0.776848
	CV Bias: 0.00404363									14	training	-0.858625	1.59915	2.23637	2.0253	0.0226426	-0.863411	0.362282	3.89052
	Pred Bias:-0.0863874									16	training	-0.965621	2.05263	1.94006	2.02945	0.036075	0.368203	0.577201	2.93745
	R^2 Cal: 0.889825									18	training	-1.44501	-2.56461	2.07434	1.73992	0.0590728	-1.39421	0.945164	16.5222
	R^2 CV: 0.768239									19	training	1.58394	-5.11455	1.65712	2.09927	0.209673	2.01135	3.35476	35.9635
	R^2 Pred: 0.85576									20	training	-1.74755	-1.40245	1.43204	1.74608	0.0282579	1.28832	0.452126	11.9275
										22	training	-2.5383	-5.53082	1.4989	1.43012	0.260492	-0.323438	4.16787	19.7732
	Percent Variance Captured by Regression Model									23	training	-2.06257	-5.12216	1.78381	1.52405	0.217875	-1.18781	3.486	20.5503
										2	test	-1.85469	2.8355	1.79509	1.92556	NaN	0.527669	1.21728	1.46453
	-----X-Block----- -----Y-Block-----									5	test	0.200352	2.03833	2.70563	2.2126	NaN	-1.99386	0.507841	7.80183
	Comp This Total This Total									9	test	8.9984	0.827153	3.55898	3.54346	NaN	-0.0627615	5.73168	6.15167
	---- ------- ------- ------- -------									13	test	-0.269279	1.01141	2.07333	2.09098	NaN	0.0713817	0.129405	7.87031
	1 46.24 46.24 84.78 84.78									17	test	-1.51241	-3.93784	2.01771	1.66567	NaN	-1.42369	2.04449	25.0747
	2 26.54 72.78 4.20 88.98									21	test	-1.36754	-1.41399	1.61131	1.80545	NaN	0.785114	0.3735	10.4283
										Descriptor	VIP Scores for RM0 (Ac)	Reg Vector for RM0 (Ac)
										IP(eV)	0.188923	-0.0282776
										SP	0.182195	-0.0275475
										Tot Q	0.183472	-0.0283857
										TF-S-OPLS	0.421844	-0.0422334
										IP(eV)	1.23731	0.0301584
										QPlogPw	0.895546	-0.0603492
										QPlogPo/w	1.38802	0.0378911
										CIQPlogS	1.14296	-0.0361508
										QPlogHERG	0.376492	0.0488671
										QPlogKhsa	1.44967	0.036966
										PHOA	0.183467	0.028385
										#NandO	0.183472	-0.0283857
										NDDOHF	0.40902	-0.046339
										LUMO	0.586911	0.0383184
										C	1.39138	0.0503279
										ECC	0.205504	-0.036162
										VCIC1	1.16339	0.0427426
										VCIC2	1.42215	0.0502302
										VCIC3	1.44517	0.0498432
										VCIC4	1.61595	0.0546576
										VCIC5	1.67104	0.0569148
										AVCIC4	0.934702	0.0685343
										AVCIC5	0.968473	0.0698227
										1M	1.21457	0.0451227
										TCIO1	1.6312	0.0611448
										TCIO3	1.40817	0.0382896
										TCIO9	1.9486	0.0662228
										TCIO10	1.34103	0.0515028				Graphic S3: Plot of the regression coefficients of descriptors of PLS model for RM0 values obtained in chromatographic system with acetone in mobile phase. Variables with VIP score >1 are marked in blue.
										Nnrs	0.783518	-0.0614359
										RF	0.920024	0.0660523
										RBC	2.10582	0.0709469

## Sheet: Details of PLS (RM0 Diox)
QSPR analysis - Details of PLS regression analysis
PLS analysis of RM0 values as dependent variable obtained in chromatographic system Dioxane/Water/Hydrochloric acid
												Compound		Scores on LV 1 (75.17%)	Scores on LV 2 (12.89%)	Y Measured 4	Y Predicted 4	Leverage	Y Stdnt Residual 4	Hotelling T^2 (88.06%)	Q Residuals (11.94%)
												1	training	-4.79365	1.14249	0.812871	0.83629	0.0565211	0.158983	0.904338	1.25537
												3	training	-3.73722	1.26582	0.792099	0.914114	0.0430694	0.822492	0.689111	1.02272
												4	training	-2.64921	1.3134	0.910262	0.987609	0.0315529	0.51828	0.504847	2.54947
	Preprocessing: Autoscale											6	training	-2.71618	-0.058537	0.972338	0.868403	0.0136685	-0.690097	0.218696	5.80609
	Num. LVs: 2											7	training	-2.29805	-0.279876	0.94454	0.876575	0.0106017	-0.450567	0.169627	6.69666
	Cross validation: leave one out											8	training	-4.1559	1.30222	1.14358	0.890414	0.0501827	-1.71292	0.802923	1.61039
	RMSEC: 0.137247											11	training	13.7833	0.795298	2.00989	1.99404	0.357838	-0.130499	5.7254	2.08869
	RMSECV: 0.172851											10	training	13.6837	0.669913	1.98371	1.97717	0.350801	-0.0535357	5.61282	2.08924
	RMSEP: 0.174984											12	training	-3.03541	0.968379	0.749975	0.934034	0.0271274	1.23052	0.434039	4.16014
	Bias: 0											15	training	-4.01835	1.60157	0.890338	0.924279	0.0574703	0.230533	0.919525	0.963698
	CV Bias: 0.00199003											14	training	-2.56968	1.25961	1.30552	0.988184	0.0292948	-2.12388	0.468717	5.84962
	Pred Bias:-0.0638558											16	training	-2.74781	2.00605	0.904237	1.03933	0.0573078	0.917521	0.916925	3.56742
	R^2 Cal: 0.899319											18	training	0.185601	0.667785	1.10205	1.11463	0.00486816	0.0832028	0.0778906	15.3663
	R^2 CV: 0.840583											19	training	6.64727	1.76472	1.55104	1.61934	0.115195	0.478832	1.84312	12.6356
	R^2 Pred: 0.967608											20	training	-2.36522	-3.46572	0.382517	0.605405	0.139745	1.58465	2.23591	12.2077
												22	training	-0.0867156	-6.04862	0.547772	0.534601	0.394189	-0.111586	6.30702	2.94424
	Percent Variance Captured by Regression Model											23	training	0.873542	-4.90449	0.793483	0.691794	0.260567	-0.779804	4.16908	5.15369
												2	test	-4.45243	0.66721	0.812871	0.818275	NaN	0.0356308	0.662802	3.09841
	-----X-Block----- -----Y-Block-----											5	test	-1.44468	1.38247	1.15149	1.07035	NaN	-0.535064	0.391165	5.5044
	Comp This Total This Total											9	test	12.6022	0.193077	2.26849	1.86813	NaN	-2.64005	4.70151	7.16522
	---- ------- ------- ------- -------											13	test	-0.924817	-0.16662	0.93614	0.973794	NaN	0.2483	0.0300706	11.7461
	1 75.17 75.17 69.45 69.45											17	test	-0.0449685	0.144815	0.945176	1.05609	NaN	0.731412	0.00367491	16.311
	2 12.89 88.06 20.48 89.93											21	test	-1.62736	-2.91967	0.753893	0.698287	NaN	-0.366673	1.54777	12.4079
												Descriptor	VIP Scores for RM0 (Diox)	Reg Vector for RM0 (Diox)
												PE -S-OPLS	1.80773	-0.0885869
												TF-S-OPLS	1.12566	-0.069133
												#stars	1.31135	0.0500955
												CNS	0.95917	-0.0621984
												QPlogPo/w	1.29928	0.0518835
												CIQPlogS	1.48066	-0.0624826
												QPlogBB	1.61769	-0.0791493
												QPlogKhsa	1.16958	0.0424025
												HOMO	1.44348	0.071045
												LUMO	1.44648	0.0770021
												1Z	0.791021	0.00972182
												2Z	0.817105	0.011359
												P	0.786638	0.00881803
												Q	0.874612	0.0182548
												H	0.804383	0.0115054
												R	0.852075	0.020191
												C	0.781808	0.0149319
												VCIC2	0.744037	0.0102818
												VCIC3	0.756853	0.0104311
												VCIC4	0.806007	0.0161273
												VCIC5	0.812403	0.0175197
												STN	0.788421	0.00930124
												TCIO1	0.839592	0.0263112
												TCIO3	0.958721	0.0330669
												TCIO8	0.8902	0.03023
												TCIO9	1.20096	0.0465922
												TCIO10	0.806318	0.0242298
												RHDPI	0.79603	0.0101128			Graphic S4: Plot of the regression coefficients of descriptors of PLS model for for RM0 values obtained in chromatographic system with dioxane in mobile phase. Variables with VIP score >1 are marked in blue.
												SRDS	0.78638	0.0092799
												SCIX2	0.769066	0.00925303
												SCIX3	0.776749	0.00707966
												SCIX4	0.831918	0.0123432
												SCIX5	0.819099	0.0109016
												CIX2	0.771343	0.0102047
												CIX3	0.783399	0.00776647
												CIX4	0.842656	0.0130967
												CIX5	0.832329	0.0117661
												RDSRI	0.829404	0.0129194
												RC6	0.822166	0.0126656
												AC	0.702241	0.00471176
												Cnum	0.822166	0.0126656
												Nnrs	1.90901	-0.0907872
												RF	1.90946	0.0905163
												TRS	0.822166	0.0126656
												RBC	1.20217	0.045773

## Sheet: Details of PLS (AChE)
QSAR analysis - Details of PLS regression analysis
PLS analysis of log (Ki/µM AChE) values as dependent variable and calculated structural descriptors as independent ones
														Scores on LV 1 (62.13%)	Scores on LV 2 (5.16%)	Y Measured 1 log(ki)Ache	Y Predicted 1 log(ki)Ache	Leverage	Y Stdnt Residual 1 log(ki)Ache	Hotelling T^2 (67.28%)	Q Residuals (32.72%)
												1	training	1.38325	-0.097597	0.0791812	0.212403	0.0107385	0.487907	0.171816	5.0679
	Preprocessing: Autoscale											3	training	-1.38655	-0.180426	0	-0.0558198	0.0122554	-0.204589	0.196087	2.20308
	Num. LVs: 2											4	training	-4.02842	-0.255009	-0.173925	-0.310912	0.0900723	-0.52311	1.44116	2.09342
	Cross validation: leave one out											6	training	-0.234096	-0.294219	0.0791812	0.0308896	0.00581081	-0.176423	0.0929729	14.4375
	RMSEC: 0.222006											7	training	-1.44118	-0.36615	0.0413927	-0.0920196	0.0195475	-0.490795	0.312759	11.5224
	RMSECV: 0.367377											8	training	-0.00522652	-0.147619	0.20412	0.0765178	0.00138989	-0.465133	0.0222383	3.29463
	RMSEP: 0.408025											11	training	1.92884	-1.89032	0.380211	-0.0384988	0.247586	-1.75834	3.96138	10.7446
	Bias: 1.249e-016											10	training	1.94439	-1.89169	-0.481486	-0.037301	0.248235	1.86612	3.97176	10.7694
	CV Bias: -0.00990238											12	training	-0.0252041	-0.316929	-0.251812	0.0462565	0.00640916	1.08925	0.102547	3.35165
	Pred Bias:0.153823											15	training	-1.36454	-0.369811	0.278754	-0.0855967	0.0185806	-1.3397	0.29729	2.16446
	R^2 Cal: 0.708272											14	training	0.179549	-0.0747978	-0.130768	0.10571	0.000527495	0.861635	0.00843993	4.8408
	R^2 CV: 0.333143											16	training	-2.49599	-0.178642	-0.283997	-0.157387	0.0350219	0.469489	0.56035	2.77911
	R^2 Pred: 0.603067											18	training	3.59017	1.56863	0.954243	0.694796	0.225171	-1.07365	3.60274	1.02357
												19	training	4.93394	0.585285	0.579784	0.653074	0.150743	0.289699	2.41188	6.44413
	Percent Variance Captured by Regression Model											20	training	7.58187	1.29847	0.973128	1.01594	0.411898	0.203375	6.59036	1.20847
												22	training	-4.75189	1.36348	-0.161151	-0.105597	0.238122	0.231839	3.80995	7.57561
	-----X-Block----- -----Y-Block-----											23	training	-5.80892	1.24734	-0.356547	-0.222151	0.277891	0.576107	4.44625	9.93551
	Comp This Total This Total											2	test	0.043226	-0.151882	-0.113509	0.0802509	NaN	0.7058	0.0236969	3.14216
	---- ------- ------- ------- -------											5	test	-6.49522	-0.351099	-1.12494	-0.553542	NaN	2.0814	3.69983	4.35623
	1 62.13 62.13 55.44 55.44											9	test	4.14125	-1.6728	0.716003	0.20116	NaN	-1.87539	4.30824	6.6492
	2 5.16 67.28 15.39 70.83											13	test	-1.45912	-0.514255	-0.0409586	-0.118533	NaN	-0.282578	0.450219	17.8375
												17	test	3.33297	1.68463	0.518514	0.690655	NaN	0.627051	3.83695	1.68559
												21	test	5.90929	1.52425	0.322219	0.90028	NaN	2.10567	5.32902	2.48188
												Descriptor	VIP Scores for log(Ki/µM), AChE	Reg Vector for log(Ki/µM), AChE
												#rotor	2.59083	-0.328888
												ACxDN^.5/SA	0.930267	-0.0458686
												NGT	0.51392	0.00553974
												MW	0.632327	-0.0953433
												MSDB	0.609273	-0.0630826
												AE	0.520382	-0.0106
												2M	1.08743	-0.0424488
												ACIX1	0.983021	-0.0022873
												ACIX2	0.93792	0.00651513
												ACIX3	1.07506	0.0470646
												ACIX4	0.999171	0.0106453
												ACIX5	0.905286	0.0436098
												RSIpw2	0.621444	0.0259497
												RSIpw3	1.07275	0.0496897
												RSIpw4	0.790548	-0.0323054
												RSIpw5	0.885101	0.0262906
												Nnum	0.585461	0.152983
												RP	0.616304	0.149008
												MCD	2.6435	0.307069
																	Graphic S5: Plot of the regression coefficients of descriptors of PLS model for for log(Ki/µM), AChe. Variables with VIP score >1 are marked in blue.

## Sheet: Details of PLS (BChE)
QSAR analysis - Details of PLS regression analysis
PLS analysis of log (Ki/µM BChE) values as dependent variable and calculated structural descriptors as independent ones
							Compound		Scores on LV 1 (40.06%)	Scores on LV 2 (17.79%)	Y Measured 2 log(ki)Bche	Y Predicted 2 log(ki)Bche	Leverage	Y Stdnt Residual 2 log(ki)Bche	Hotelling T^2 (81.87%)	Q Residuals (18.13%)
							1	training	-0.035279	-1.13596	0.322219	0.236274	0.0578225	-0.471793	0.92516	7.20185
							3	training	-2.4247	-0.522954	-0.0362122	-0.200675	0.0507673	-0.899454	0.812277	1.57114
	Preprocessing: Autoscale						4	training	-4.38881	0.806496	-0.119186	-0.350584	0.122174	-1.31599	1.95478	3.1654
	Num. LVs: 4						6	training	1.94585	-0.787088	0.544068	0.633607	0.261505	0.55518	4.18409	7.65712
	Cross validation: leave one out						7	training	0.934087	-0.315495	0.414973	0.507989	0.250211	0.572379	4.00338	5.18851
	RMSEC: 0.132235						8	training	-1.53829	-1.01273	-0.0362122	-0.0818757	0.0360625	-0.247823	0.577	3.40907
	RMSECV: 0.233518						11	training	-1.86235	-2.47348	0	-0.082363	0.358163	-0.547794	5.73062	2.09749
	RMSEP: 0.332772						10	training	-1.84081	-2.47448	-0.0861861	-0.0770996	0.356947	0.0603775	5.71116	2.18657
	Bias: 1.94289e-016						12	training	-0.804086	-1.32569	0.0791812	0.0186484	0.0271211	-0.327009	0.433937	5.70055
	CV Bias: 0.0109926						15	training	-2.48676	-1.74751	-0.823909	-0.471989	0.239859	2.15077	3.83775	10.2953
	Pred Bias:0.172043						14	training	-1.1409	-0.977583	-0.187087	-0.0604203	0.0408282	0.689145	0.653252	4.77339
	R^2 Cal: 0.943206						16	training	-3.50855	0.0880193	-0.420216	-0.342377	0.0883061	0.434381	1.4129	2.94585
	R^2 CV: 0.824716						18	training	5.29663	-1.01174	0.740363	0.565215	0.552925	-1.39576	8.8468	4.93865
	R^2 Pred: 0.777567						19	training	7.87528	-0.172088	1.34242	1.34658	0.323705	0.0269432	5.17928	17.5537
							20	training	7.08038	1.62415	1.39794	1.44292	0.449757	0.323078	7.19611	10.4138
	Percent Variance Captured by Regression Model						22	training	-0.992585	5.78493	0.518514	0.551728	0.389034	0.226415	6.22455	1.79525
							23	training	-2.10912	5.6532	0.255273	0.270371	0.394811	0.103417	6.31697	1.952
	-----X-Block----- -----Y-Block-----						2	test	-0.969143	-0.361994	0.50515	0.193245	NaN	-1.66195	1.64801	7.15912
	Comp This Total This Total						5	test	-6.10588	2.37228	-1.04096	-0.413484	NaN	3.34344	4.60673	7.15996
	---- ------- ------- ------- -------						9	test	-0.0466949	-2.84059	0.176091	0.197484	NaN	0.11399	6.70108	2.25904
	1 40.06 40.06 79.81 79.81						13	test	1.09342	-0.70942	0.146128	0.460512	NaN	1.67517	2.36973	19.3869
	2 17.79 57.85 8.76 88.57						17	test	5.78733	-1.26984	0.39794	0.616455	NaN	1.16434	9.40827	19.7097
	3 11.44 69.29 3.62 92.19						21	test	5.23641	0.415609	0.748188	0.910581	NaN	0.865298	4.95265	15.8045
	4 12.57 81.87 2.13 94.32
							Descriptor	VIP Scores for log (Ki/µM), BChE	Reg Vector for Y log (Ki/µM), BChE
							PE -S-OPLS	2.02638	0.249227
							#rotor	0.884061	0.0128614
							CNS	1.10163	0.190195
							PISA	1.08457	0.0218639
							QPPMDCK	1.02569	0.0752011
							RuleOfThree	0.779148	0.0609544
							AVCIC1	1.06316	-0.0503028
							AVCIC2	1.10954	-0.0643499
							AVCIC3	1.12054	-0.0481359
							AVCIC4	1.21686	-0.0195531
							AVCIC5	1.24582	-0.0341534
							STN	0.703377	0.0157642
							KBLI	1.06315	-0.0503003
							TCIO6	1.33266	0.0497731
							MTCIO2	0.74588	0.0641097
							MTCIO4	0.320861	-0.0902743
							MTCIO7	0.172012	-0.0679093
							ACIX1	0.874357	-0.057205
							ACIX2	0.782494	-0.0605039
							ACIX3	0.709601	-0.0382879
							ACIX4	0.759203	-0.0538803
							RSIpw2	0.708858	0.0404545
							RSIpw3	1.35538	0.0555171		Graphic S6: Plot of the regression coefficients of descriptors of PLS model for for log(Ki/µM), BChE values. Variables with VIP score >1 are marked in blue.
							RSIpw4	0.436099	-0.013312
							RSIpw5	0.461236	-0.00098855
							Nnum	1.0694	0.102464
							Nnrs	1.20355	0.0525916
							RF	1.22466	-0.0499412
							RP	1.2682	0.105237
							MCD	1.56336	0.059009
							RFD	1.28229	-0.0344617
							RCI	1.30597	-0.0378651

[truncated: 13 more sheets: Sheet11, Sheet12, Sheet13, Sheet14, Sheet15, Sheet16, Sheet17, Sheet18, Sheet19, Sheet6, Sheet7, Sheet8, Sheet9]
